# 1 **Modern human origins: multiregional evolution of autosomes** 2 **and East Asia origin of Y and mtDNA**

3  
4 Dejian Yuan<sup>1</sup>, Xiaoyun Lei<sup>1</sup>, Yuanyuan Gui<sup>1</sup>, Zuobin Zhu<sup>2</sup>, Dapeng Wang<sup>3</sup>, Jun Yu<sup>3</sup>, and  
5 Shi Huang<sup>1\*</sup>  
6

7 <sup>1</sup>State Key Laboratory of Medical Genetics, School of Life Sciences, Xiangya Medical  
8 School, Central South University, 110 Xiangya Road, Changsha, Hunan 410078, P.R.  
9 China

10  
11 <sup>2</sup>Department of Genetics, Xuzhou Medical University, Xuzhou, Jiangsu 221004, China.

12  
13 <sup>3</sup>CAS Key Laboratory of Genome Sciences and Information, Beijing Institute of Genomics,  
14 Chinese Academy of Sciences, Beijing 100029, P.R. China

15  
16 \*Corresponding author: [huangshi@sklmg.edu.cn](mailto:huangshi@sklmg.edu.cn), tel 86-731-84805342  
17  
18  
19  
20  
21  
22

## 23 **Abstract**

24 Recent studies have established that genetic diversities are mostly maintained by  
25 selection, therefore rendering the present molecular model of human origins untenable.  
26 Using improved methods and public data, we have revisited human evolution and derived  
27 an age of 1.91-1.96 million years for the first split in modern human autosomes. We found  
28 evidence of modern Y and mtDNA originating in East Asia and dispersing via  
29 hybridization with archaic humans. Analyses of autosomes, Y and mtDNA all suggest that  
30 Denisovan and Neanderthal were archaic Africans with Eurasian admixtures and  
31 ancestors of South Asia Negritos and Aboriginal Australians. Verifying our model, we  
32 found more ancestry of Southern Chinese from Hunan in Africans relative to other East  
33 Asian groups examined. These results suggest multiregional evolution of autosomes and  
34 replacements of archaic Y and mtDNA by modern ones originating in East Asia, thereby  
35 leading to a coherent account of modern human origins.  
36  
37  
38  
39  
40  
41  
42

43 **Key words:** Multiregional, Out-of-Africa, Neutral theory, maximum genetic diversity  
44 (MGD) hypothesis, Neanderthals, Denisovans, Heidelbergensis, Aboriginal Australians,  
45 Negritos  
46  
47

## 48 Introduction

49 There are two competing models of modern human origins termed “Multiregional” and the  
50 recent “Out-of-Africa” hypothesis <sup>1</sup>. In the Multiregional model <sup>2-4</sup>, recent human evolution  
51 is seen as the product of the early and middle Pleistocene radiation of *Homo erectus* from  
52 Africa. Thereafter, local differentiation led to the establishment of regional populations  
53 which evolved to produce anatomically modern humans (AMH) in different regions of the  
54 world, made of four major differentiated groups (Africans, Europeans, East Asians, and  
55 Aboriginal Australians). *Homo* has been a single species since the genus first appeared  
56 in the fossil record ~2.3-2.8 million years (myr) ago. Support for this model is based on  
57 fossils and Paleolithic cultural remains but consistent molecular evidence has been  
58 lacking. While autosomal data have put a common ancestor of humans at ~1.5 myr ago,  
59 it is still far short of 2 myr <sup>5</sup>. In addition to regional continuity, the model further suggests  
60 hybridization among different groups <sup>4</sup>. Seeming difficulties here are the clear separation  
61 between modern and archaic mtDNAs and Y, the absence of archaic mtDNAs and Y in  
62 modern humans <sup>6,7</sup>, and the young age for the modern Y (~100 ky) and mtDNA (~200 ky)  
63 <sup>8-10</sup>.

64 The single origin Out of Africa model assumes that there was a relatively recent  
65 common ancestral population for *Homo sapiens* which already showed most of the  
66 anatomical features shared by present day people. This population originated in Africa  
67 ~200 ky ago, followed by an initiation of African regional differentiation, subsequent  
68 radiation from Africa, and final establishment of modern regional characteristics outside  
69 Africa <sup>1,10</sup>. These modern Africans replaced the archaic *Homo* in Eurasia with limited  
70 genetic mixing <sup>11-15</sup>. Support for this model comes from the African location of the earliest  
71 fossils (~315 ky ago in Jebel Irhoud, Morocco) of mostly but not all AMH features <sup>16,17</sup> and  
72 the Neutral theory interpretation of the greater genetic diversity in Africans <sup>10</sup>. Difficulties  
73 with this model include the discrepancy between autosomal and Y/mtDNA age, the Y  
74 haplotype A00 with age >300 ky <sup>18</sup>, fossils with AMH features of greater than 85 ky old  
75 (upto ~260 ky) in multiple Eurasia locations (Daoxian Hunan, Xuchang Henan, Bijie  
76 Guizhou, and Dali Shaanxi in China, Misliya and Shkul/Qafzeh in Israel, and Al Wusta-1  
77 in Arabia) <sup>19-24</sup> and the generally weaker support from fossils and stone tools relative to  
78 the multiregional model. While the AMH fossils found outside Africa have been assumed  
79 to originate in Africa, an origin in Asia has not been excluded. In fact, in 1983,  
80 researchers have derived an mtDNA tree rooted in Asia <sup>25</sup>. Unfortunately, this model was  
81 overlooked without anyone ever explaining why the Asia model was less valid than the  
82 Africa model.

83 Most fatal to the Out of Africa model, however, is that the theoretical foundation for it,  
84 the Neutral theory, is widely known to be incomplete or has yet to solve the century old  
85 riddle of what determines genetic diversity <sup>26</sup>. The neutral theory has been pronounced  
86 dead as an explanatory framework for most molecular evolutionary phenomena <sup>27-29</sup> and  
87 as such should not have been so freely used to make sense of genetic diversity patterns.  
88 Obviously, inferring human origins by using genetic diversity data must wait until one has  
89 a complete understanding of what genetic diversity means. The standard for such an  
90 understanding should of course be a complete and coherent account of all known  
91 puzzles related to genetic diversity.

92 The unusual admixed features of the Aboriginal Australians have yet to be explained  
93 by any model <sup>1</sup>. A list of morphological features aimed at defining modern humans would  
94 exclude both modern Aboriginal Australians and Neanderthals, indicating some shared  
95 traits between the two <sup>30</sup>. Also unexplained is the origin of Negritos in South Asia. Despite  
96 the obvious phenotypic similarities and close Y and mtDNA relationships, no special

97 autosomal relationship has yet been found between Negritos and African pygmies or  
98 even among different Negrito groups in South Asia <sup>31</sup>.

99 In recent years, a more complete molecular evolutionary theory, the maximum  
100 genetic distance or diversity (MGD) hypothesis, has been making steady progress in  
101 solving both evolutionary and contemporary biomedical problems <sup>32-39</sup>. The core concept  
102 of the MGD theory, maximum genetic diversity, is *a priori* expected and supported by  
103 numerous facts <sup>32,40,41</sup>. In contrast, the Neutral theory and its infinite site model fail to take  
104 MGD into account and tacitly assume that nearly all observed genetic distances or  
105 diversities could still increase with time with no limit defined <sup>42,43</sup>. The MGD theory has  
106 solved the two major puzzles of genetic diversity, the genetic equidistance phenomenon  
107 and the much narrower range of genetic diversity relative to the large variation in  
108 population size <sup>26,32</sup>. The primary determinant of genetic diversity (or more precisely MGD)  
109 is species physiology <sup>32,44</sup>. The genetic equidistance result of Margoliash in 1963 is in fact  
110 the first and best evidence for MGD rather than linear distance as mis-interpreted by the  
111 molecular clock and in turn the Neutral theory <sup>32,38,39,45-48</sup>. Two contrasting patterns of the  
112 equidistance result have now been recognized, the maximum and the linear <sup>39,46</sup>. The  
113 Neutral theory explains only the linear pattern, which however represents only a minority  
114 of any genome today. The link between traits/diseases and the amount of SNPs shows  
115 an optimum genetic diversity level maintained by selection, thereby providing direct  
116 experimental disproof for the neutral assumption for common SNPs <sup>33,34,49-53</sup>. More direct  
117 functional data invalidating the neutral assumption have also been found <sup>54,55</sup>.

118 One simple method to determine whether any DNA fragment has reached MGD is to  
119 count the number of overlap sites (coincident substitutions) in a sequence alignment of  
120 three different species <sup>38</sup>. Such sites represent positions where mutations leading to  
121 different residues had occurred independently at the same position in at least two species,  
122 which would be a low probability event under the Neutral theory or its infinite site  
123 assumption but common under the MGD theory <sup>38</sup>. The Neutral theory is only valid for  
124 slow evolving genes yet to reach MGD, where its infinite sites assumption holds and the  
125 number of overlap sites follows calculation from probability theory <sup>38</sup>. Unfortunately,  
126 however, nearly all existing phylogenetic results are from fast evolving sequences that  
127 were *assumed* to follow the infinite site model when they in fact do not as they have now  
128 been shown to be enriched with overlap sites <sup>38</sup>.

129 Coincident substitutions at overlap sites do not contribute to genetic distance and  
130 make the relationship between distance and time hard if not impossible to model  
131 accurately. To overcome this, we developed the “slow clock” method that only uses slow  
132 evolving DNAs with zero or few overlap sites. The method has produced a separation  
133 time for the pongids and humans that is remarkably consistent with common sense and  
134 the original interpretation of fossil records and drastically different from the result of fast  
135 evolving DNAs <sup>39</sup>. Here we used the MGD theory and its related methods to revisit the  
136 evolution of modern humans. The unique value of the MGD theory in human origin  
137 studies is that it helps select the truly informative sequences that would follow the neutral  
138 theory. Once such sequences are selected, the remaining methodologies would be  
139 mostly covered by the neutral theory, and we fully grant the neutral theory to be valid for  
140 truly neutral sequences still at the linear phase of accumulating variations. We just  
141 disagree with its treatments of most genome sequences to be neutral and at the linear or  
142 near linear phase of accumulating genetic diversity.

143

144 **Results**

145 **Contrast between fast and slow evolving DNAs in genetic diversity patterns**

146 Different human groups are well known to share ~85% of common SNPs<sup>56</sup>. However,  
147 sharing may not necessarily mean genetic exchanges or common ancestry as saturation  
148 or parallel mutation could also explain it. These two explanations could be distinguished  
149 by asking whether the fraction of shared SNPs is similarly distributed in the fast versus  
150 the slow evolving sequences. Since the majority of human genomes are made of  
151 non-coding sequences and hence faster evolving relatively to coding sequences, we  
152 randomly selected from the 1000 genomes project phase 3 (1KG) data a set of 255K  
153 SNPs to represent the fast evolving SNPs or the average genome wide variation  
154 (Supplementary Table S1)<sup>57</sup>. To find the slow evolving SNPs, we first identified the slow  
155 evolving proteins by aligning human and *Macaca* proteomes and then selected only the  
156 non-synonymous (nonsyn) SNPs located in these proteins as previously described<sup>52</sup>.  
157 Proteins that show the highest identity between human and monkey were considered the  
158 slowest evolving, including 423 genes > 304 amino acid in length with 100% identity and  
159 178 genes > 1102 amino acid in length with 99% identity between monkey and human.  
160 We downloaded 1KG data and obtained a list of ~15K nonsyn SNPs located in these  
161 slow evolving proteins as our slow set of SNPs (Supplementary Table S2 and S3).

162 To test the amount of sharing, we examined the SNP frequency files from 1KG. For  
163 the three human groups, African (AFR), East Asian (ASN), and European (EUR), we  
164 considered a SNP as shared if it has frequency > 0 in more than one group and unique if  
165 it is present in only one group. We examined 3 different sets of SNPs, the slow set as  
166 defined above, syn SNPs in the slow genes as defined above (Supplementary Table S3),  
167 and the random set as defined above. The results showed a clear pattern of more sharing  
168 in fast evolving SNPs (Table 1), indicating saturation level of genetic diversity, which  
169 further confirmed previous findings of higher genetic diversity in patients of complex  
170 diseases relative to normal matched controls<sup>34,52,53</sup>. That the observed sharing (24%) in  
171 fast SNPs was lower than the 85% for common SNPs was because we did not filter the  
172 SNPs by frequency and hence there were many private or low frequency SNPs in our set.  
173  
174

|                    | Shared | Unique | No var. | #SNPs  |
|--------------------|--------|--------|---------|--------|
| <b>Nonsyn slow</b> | 0.05   | 0.66   | 0.29    | 15422  |
| <b>Syn slow</b>    | 0.11   | 0.64   | 0.24    | 16591  |
| <b>Random set</b>  | 0.24   | 0.52   | 0.24    | 254489 |

175

176 **Table 1. Sharing of different types of SNPs among three groups.** Shared SNPs are  
177 present in more than one group and unique SNPs are present in only one group. Shown  
178 are fractions of each type of SNPs. SNPs that are not found in any of the three groups  
179 (AFR, ASN, and EUR) are grouped as no variations (No var.).  
180

181 We next examined the genetic diversity levels within each of the 5 major human  
182 groups as sampled by 1KG, AFR, AMR (American), ASN, EUR, and SAS (South Asians),  
183 by calculating the average pairwise genetic distance (PGD) per group in different types of  
184 SNPs, including the slow set and the random set as defined above, and the stop codon  
185 gain/loss set (Fig. 1). In our analysis here, we have excluded 4 highly admixed groups  
186 Americans of African Ancestry in SW USA (ASW), African Caribbeans in Barbados (ACB),  
187 Colombians from Medellin Colombia (CLM), and Puerto Ricans from Puerto Rico (PUR).  
188 Since certain deleterious SNPs may exist only in heterozygous (het) state rather than

189 homozygous (hom) state, we calculated, in addition to total PGD contributed by both het  
190 and hom differences, also the hom PGD resulting from hom mismatches that should  
191 better represent neutral diversity. As shown in Fig. 1, hom PGD showed different pattern  
192 from total PGD only in the slow SNPs, with the hom PGD level of AFR below the average  
193 of five groups while that of AMR being the highest. Remarkably, the stop codon set  
194 showed similar pattern as the random set, with AFR having the largest PGD. This  
195 indicates functionality rather than neutrality for the average genome wide SNPs since  
196 stop codon SNPs are definitely functional given its dramatic effect on protein structure <sup>55</sup>.  
197 To verify the results of stop codon SNPs, we also found similar PGD pattern in the  
198 splicing site gain/loss SNPs that are also expected to be functional (Supplementary  
199 Information S1 and Fig. S1A-B). Overall, these results showed Europeans with the lowest  
200 diversity in stop codon and splicing SNPs and East Asians with the lowest diversity in  
201 random set ( $P < 0.01$ ). Africans have the highest genetic diversity levels in all types of  
202 non-neutral SNPs examined ( $P < 0.01$ ), thereby deeming the Out of Africa model  
203 untenable.  
204

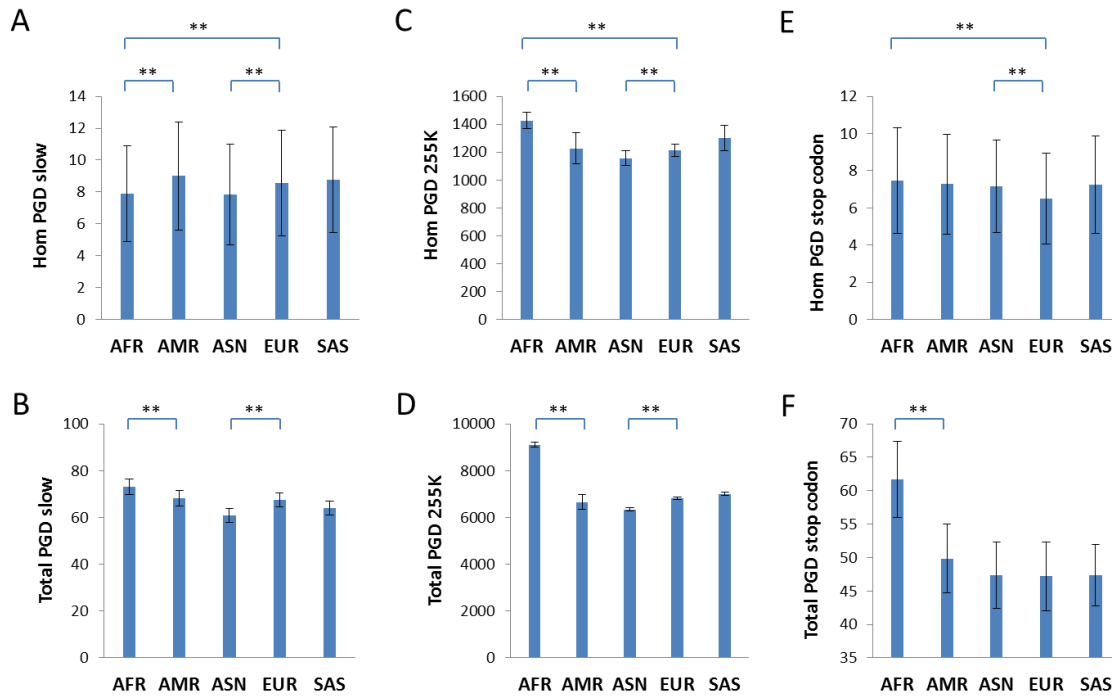

205  
206

### Figure 1. Pairwise genetic distance as measured by different types of SNPs.

208 Pairwise genetic distance (PGD), either by homozygous mismatches (Hom) or by both  
209 homozygous and heterozygous mismatches (Total), as measured by three different types  
210 of SNPs is shown for each of the 5 major human groups in the 1KG. Known heavily  
211 admixed groups such as ASW and ACB in the African group or CLM and PUR in the  
212 American group were excluded in the analysis. Data are means with standard deviation.  
213 \*\*, P < 0.01, t test, 2 tailed.

214

215 To confirm if we have made the appropriate cut-off in selecting the slow SNPs as our  
216 phylogeny-informative set of neutral SNPs, we verified that the next set of just slightly  
217 less conserved nonsyn SNPs (total number ~13.7K, Supplementary Table S4) within 361  
218 autosomal proteins already behaved like the random set or the stop codon set (800-1102  
219 aa in length with identity between human and monkey >99% but <100%) (Supplementary  
220 Information S1, Fig. S1 C-D). Furthermore, syn SNPs within the slow set of proteins as  
221 defined above (Supplementary Table S3) gave PGD patterns similar to the stop codon  
222 SNPs but unlike the nonsyn SNPs within the same set of proteins (Supplementary  
223 Information S1, Fig. S1 E-F). Finally, we confirmed that these slow evolving proteins still  
224 have neutral nonsyn variations that are not under natural selection by showing that these  
225 proteins have fewer overlap or recurrent mutation sites than relatively faster evolving  
226 proteins (Supplementary Information S2 and Table S5), and that known positively  
227 selected genes are faster evolving (Supplementary Information S3). Together, these  
228 results suggest that only hom distance calculated from the slow nonsyn SNPs, hereafter  
229 referred as the slow SNPs, can be informative to phylogenetic inferences.

230

### 231 Divergence time between major human groups

232

232 Using hom distance measured by slow SNPs, we found, as expected, Africans as the  
233 outgroup to the other 4 groups as sampled in 1KG because the non-African groups are  
234 closer to each other than to Africans (Supplementary Fig. S2A). Also as expected from a

235 *priori* reasoning but not from the existing model, Africans are closer to each other than to  
236 non-Africans. However, for the random set of SNPs, total distance within Africans was  
237 similar to that between Africans and non-Africans, which is well known from previous  
238 studies and reflects saturation as we now realize from the MGD theory (Supplementary  
239 Fig. S2B). This result also established the maximum genetic equidistance phenomenon,  
240 previously known only at the inter-species level, at the intra-species level where groups  
241 with lower MGD are equidistant to the group with the highest MGD with the distance  
242 being equal to the MGD of the highest MGD group. The result independently confirms the  
243 difference between slow and fast SNPs and the fact that fast SNPs are at saturation level  
244 of genetic diversity.

245 To estimate the time of separation between major human groups, we determined the  
246 mutation rate of the slow evolving genes. We found 34 informative genes in the 178 slow  
247 evolving genes as defined above that showed gap-less alignment in any pair of  
248 comparisons among humans, chimpanzees, orangutans, and monkeys (Supplementary  
249 Table S6). Assuming gorilla and orangutan contributed similarly to their genetic distance  
250 since their split 12 myr as inferred from the fossil records<sup>58</sup>, we obtained a gorilla or  
251 orangutan mutation rate of 0.000173 aa per myr per aa for the 34 genes (47628 aa).  
252 Given a distance of 0.00385 aa per aa between human and orangutan and their  
253 separation time of 17.6 myr<sup>39</sup>, we used the formula  $0.00385 = R_{\text{human}} \times 17.6 + 0.000173 \times$   
254  $17.6$  to obtain the human mutation rate as 4.46E-5 aa per myr per aa, which is 3.88 times  
255 slower than orangutan's. Given this mutation rate and the distance matrix (total distance  
256 including both het and hom distances) as shown in Table 2 (only the largest distance  
257 among groups are shown), we estimated the split time between ESN (Esen in Nigeria)  
258 and GBR (British in England and Scotland) as 1.96 myr, consistent with the known first  
259 migration out of Africa for the Homo species as shown by the fossil records. The split  
260 between ESN and CHS (Southern Han Chinese) was similar or slightly shorter at 1.91  
261 myr and not significantly different from that between ESN and GBR. In fact, using hom  
262 distance as measured by the slow SNPs which represent neutral distance better, ESN is  
263 slightly closer to CHS (14.87) than to GBR (14.93). We only used the largest distance  
264 between groups, which was between ESN and GBR, to calculate the time in order to be  
265 more precise. Since admixture was common, shorter distances between some pairs of  
266 groups may be a result of gene flow and hence not reflect true separation time.

267  
268

| Groups | Myr (total # of aa mismatches) |              |              |
|--------|--------------------------------|--------------|--------------|
|        | ESN                            | GBR          | CHS          |
| ESN    | 1.82 (47.21)                   | 1.96 (51.03) | 1.91 (49.62) |
| GBR    |                                | 1.56 (40.65) | 1.65 (42.8)  |
| CHS    |                                |              | 1.43 (37.19) |

269

270 **Table 2. Time of divergence between human populations.** The separation time and  
271 average pairwise genetic distance (total distance including both het and hom distances)  
272 between human populations (ESN, GBR, CHS) in 9578 slow evolving autosome SNPs  
273 located in the 178 genes (>99% and <100% identity between human and Macca) with  
274 total length 291083 aa. The human mutation rate was estimated as 4.46E-5 aa/myr/aa  
275 x 291083 aa = 13.0 aa/myr.

276

277

278

## 279 **Y chromosome phylogeny**

280 The existing Y phylogenetic tree depends on inferring derived alleles and in turn requires  
281 the validity of the infinite site assumption, which means no maximum genetic distance  
282 and no recurrent mutations. However, this assumption can be proven invalid even just by  
283 the existing Y tree itself, since the tree shows numerous recurrent mutations that were  
284 simply ignored without valid reasons (Supplementary Table S7), especially for the early  
285 branches with some such as KxLT and HIJK contradicted by as much as 50% of all  
286 relevant SNPs<sup>59</sup>. That these self-contradictions mostly occurred for the early African  
287 branches such as BT and CT but rarely for the terminal Eurasian ones indicates the  
288 unrealistic nature of these early branches. Also, while haplotypes with few sequence  
289 variations from the ancestor of F, C, D, E, NO, KxLT, or K are routinely found in present  
290 day people, none could be found for these early branches. The branching pattern in  
291 Africans often involves one branch, such as A00, with few or no sub-branches while the  
292 other branch A0-T accounting for all of the remaining haplotypes on Earth, which is odd  
293 and against branching patterns known in experimental biology such as embryonic  
294 differentiation into three layers with each layer giving rise to multiple cell types.

295 Given functionality for genome wide autosomal SNPs as discussed above, it is easily  
296 inferred that most SNPs in Y chr are also non-neutral. Evidence for extreme natural  
297 selection on Y is also known<sup>60</sup>. We therefore redrew the Y tree based on shared alleles  
298 (rather than on derived alleles), which may mean common physiology more than  
299 common adaptations if physiology is the chief determinant of MGD. Using previously  
300 defined haplotypes for 1KG samples (Supplementary Table S8) and 58251 cleanly called  
301 SNPs (no individual with uncalled SNPs, Supplementary Table S9)<sup>61</sup>, we found a major  
302 megahaplogroup ABCDE (Fig. 2). Megahaplotype F, defined as lacking any mutations  
303 that define other haplotypes, is the ancestor. All F-like or F\* haplotypes sequenced so far  
304 are partial ABCDE carrying 4 (Lahu\_HGDP01320), 13 (Malay\_SSM072), or 14  
305 (KHV\_HG02040) of the 151 mutations that group ABCDE (Fig. 2)<sup>61-63</sup>. The F\* haplotype  
306 is most common in East Asia, present in 5 of 7 (71.4%) Lahu males in Yunnan of South  
307 West China<sup>64</sup>, 10-15% of Han and other minority Chinese, and low percentages (<10%)  
308 in South Asians and French. Furthermore, the top 4 individuals among 1KG closest to the  
309 ~45 ky old Western Siberian Ust'-Ishim who carried NO haplotype and was expected to  
310 be most like the AMH ancestor were all East Asians with Asian haplotypes F and O (F2 in  
311 KHV\_HG02040, O2 in CHB\_NA18534, O3 in CHS\_HG00559, O3 in KHV\_HG02088),  
312 indicating least deviation from the ancestor for Asian haplotypes<sup>14</sup>. These three O type  
313 East Asian individuals also were the closest to the three F\* carrying individuals above.  
314 These results suggest the origin of F in East Asia with subsequent migration to other  
315 regions of the world (Supplementary Fig. S3).

316 In our tree, alleles previously used to define BT and CT now merely represent alleles  
317 associated with the original F ancestor. The AB grouping makes more sense with  
318 phenotypes than the BT grouping since it groups African B with African A rather than with  
319 the CT group containing mostly Eurasians. The key feature of our tree is that every  
320 haplotype besides the original F is associated with haplotype specific SNPs and there are  
321 no inconsistent SNPs. Such self-consistency alone would qualify it as more correct than  
322 the self-inconsistent tree rooted in Africa.

323 A real haplotype should exist in a way that has only its own haplotype specific SNPs  
324 plus private SNPs. While it is more likely to be the case for terminal haplotypes, it is not  
325 impossible for ancestral haplotypes close to the root of the tree, which could be used to  
326 distinguish two different competing classifications on an ancestral haplotype. One of the  
327 major differences between our Out of Asia tree and the Out of Africa tree is the position of  
328 haplotype C, which belongs to ABCDE in the former and CT in the latter. The ABCDE



329 haplotype is closer to the root (among the first to branch out from the root) in the Asia tree  
 330 than CT is (2<sup>nd</sup> to branch out from the root) in the Africa tree. Hence, relative to ABCDE,  
 331 CT should have a higher chance to be like a more terminal haplotype. The number of CT  
 332 defining SNPs is larger than ABCDE (264 vs 151, with additional 50 SNPs contradicting  
 333 CT), which should also make CT more like a terminal branch. In reality, however, one  
 334 found the exact opposite. People with only ABCDE specific SNPs plus private SNPs have  
 335 been found as in present day people Lahu\_HGDP01320, Malay\_SSM072, and  
 336 KHV\_HG02040 (Figure 2). That these Y chr had only a portion of ABCDE defining SNPs  
 337 is consistent with the dynamics of the ancient appearance of ABCDE. Also consistent  
 338 with the ancestral status of ABCDE, the 38.7 ky old Kostenki14 had 83 among 84  
 339 informative SNPs supporting it as ABCDE and 88/92 as C, and the 30.6 ky Vestonice43  
 340 had 19/20 as ABCDE and 20/22 as C<sup>65,66</sup>. In contrast, no one with only CT specific  
 341 alleles plus private SNPs has been found to exist today or in the past. All ancient  
 342 Europeans known to be CT and lacking alleles for downstream haplotypes were in fact  
 343 missing informative sites for at least some haplotypes due to incomplete coverage in  
 344 sequencing<sup>65,66</sup>. These findings strongly support grouping C in ABCDE rather than in CT,  
 345 thereby invalidating the Out of Africa tree.  
 346

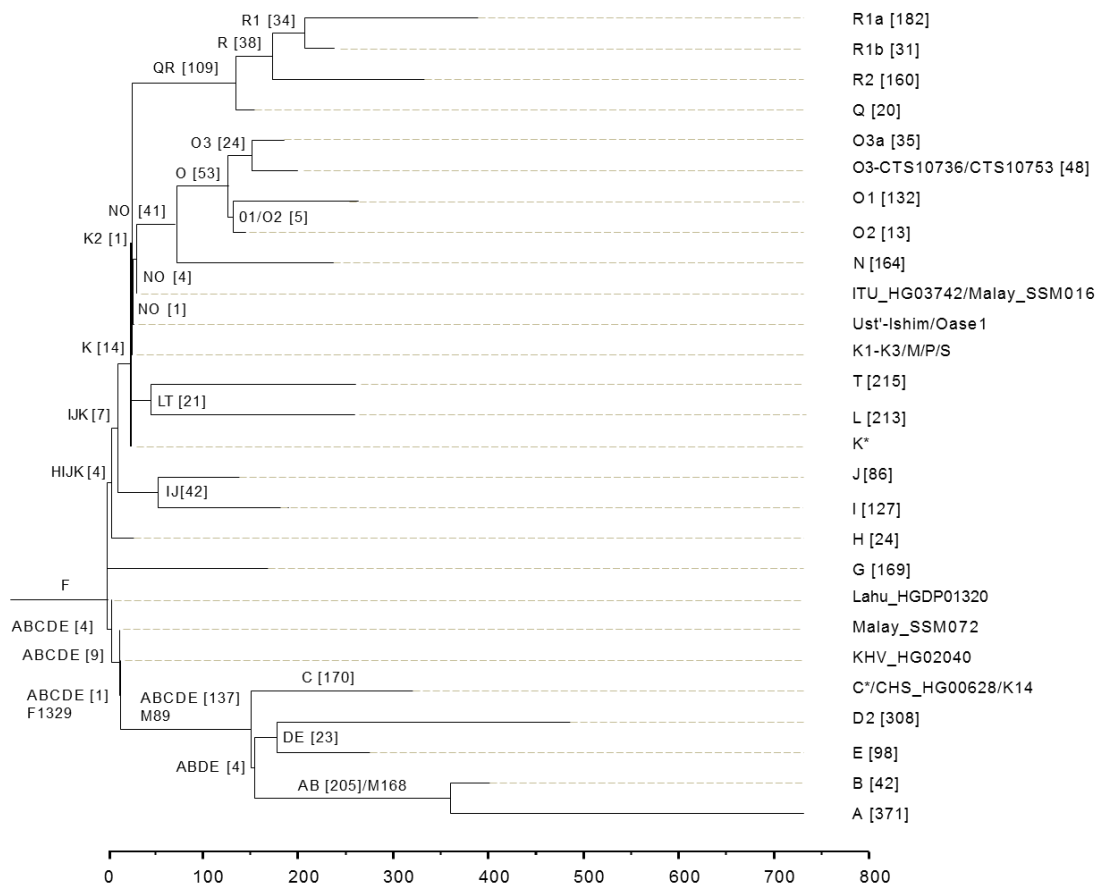

349 **Figure 2. Y chromosome phylogeny.** Branch lengths are drawn proportional to the  
 350 number of SNPs. Only major haplogroups are shown with defining SNPs indicated for  
 351 some. Numbers in parenthesis indicate the number of SNPs defining a haplogroup  
 352 among the 58251 cleanly called SNPs in the 1KG. Individuals with few changes from an  
 353 ancestor haplotype are also listed as shown.

354 **mtDNA phylogeny**

355 The existing mtDNA phylogenetic tree has exactly the same problems as the existing Y  
356 tree as discussed above. Based on previously defined mtDNA haplotypes for 1KG  
357 (Supplementary Table S8)<sup>61</sup>, we redrew the mtDNA tree using slow evolving SNPs, which  
358 alter amino acids or RNA sequences (Fig. 3A, Supplementary Information S4,  
359 Supplementary Fig. S4, Supplementary Table S10). Fast SNPs are more involved in  
360 adaptation to fast changing environments and should not be used whenever possible.  
361 Two lines of evidence suggest haplogroup R as the ancestor of all modern haplogroups.  
362 First, ancient humans are expected to be closer to the ancestor and the oldest AMH,  
363 Ust'-Ishim, carried the R\* haplotype<sup>14</sup>. Second, R0 is the least differentiated haplotype  
364 and closest to the ancient haplotype in Ust'-Ishim (Fig. 3B). That R0 is most common in  
365 Chinese among 1KG indicates origin of R in East Asia (Fig. 3B) and subsequent  
366 diversification in other regions of the world (Supplementary Fig. S5).

367 Unlike Y, mtDNA diversification as defined by slow SNPs here is far more star like  
368 with multiple parallel haplotypes and few hierarchical structures (Fig. 3A, Supplementary  
369 Fig. S4), which is expected from the vast difference in the possible number of offspring  
370 between males and females. Many female individuals with R0 might each serve as an  
371 ancestor of a specific haplotype within R or N haplogroup, and R is not a sub-branch of N.  
372 M also directly derived from R0. L and numerous M subtypes shared a few defining  
373 SNPs.

374 To confirm M giving rise to L, we examined mtDNA distance between African (YRI) L  
375 and South Asian (BEB) M and found L3e to be the closest to M (Fig. 3C). Also, M of BEB  
376 or GIH is closer to L3e than M of CHS, indicating a more direct role for BEB or GIH in  
377 dispersing AMH mtDNA into Africa and a Southern route into Africa. Consistently, in  
378 autosome distance, BEB or GIH with M haplotype were closer to Africans than those with  
379 N (including R) haplotype (Fig. 3D), despite the fact that people with M had larger  
380 autosomal nucleotide diversity than those with N (PGD: M\_BEB = 8.59, N\_BEB = 7.9,  
381 M\_GIH = 8.42, N\_GIH = 8.36). M is closer to the common ancestor of M and L since all L  
382 types are at least 2 slow SNPs (769, 1018) away from the common ancestor. There might  
383 be a time when there were multiple M types with no L, and then one of the M types with  
384 mutations in 769 and 1018 sites became the common ancestor of L types.

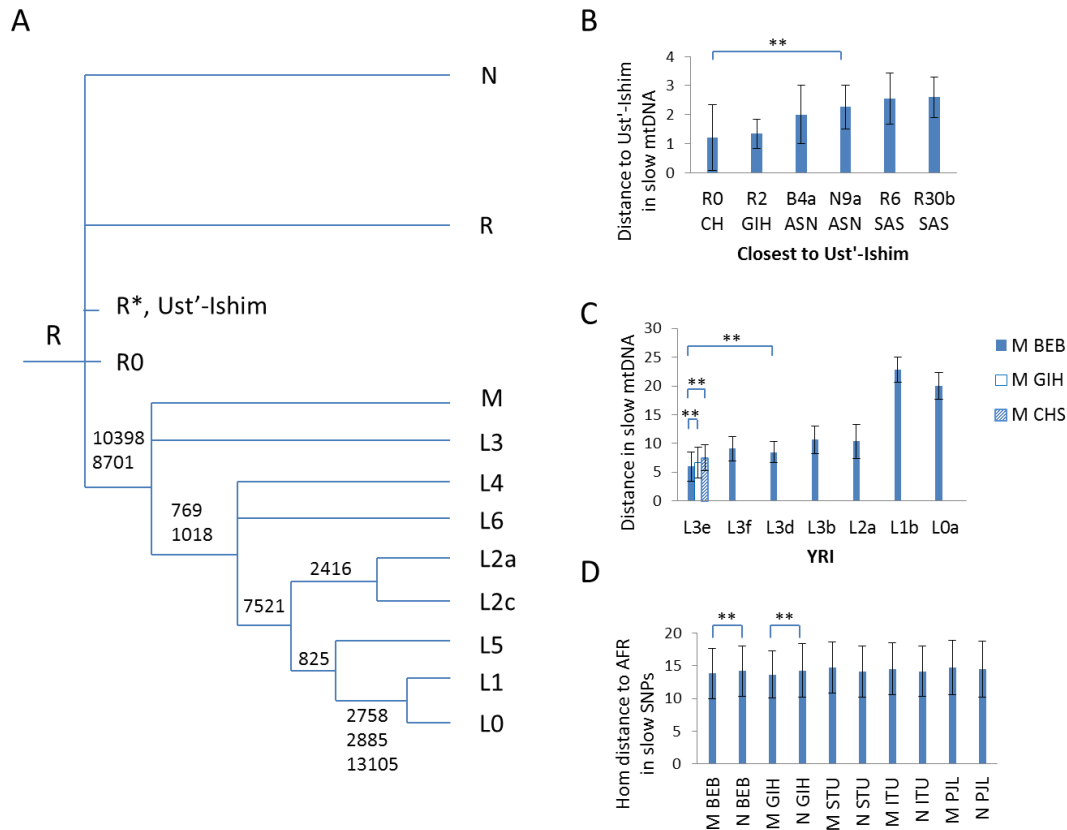

385  
 386 **Figure 3. mtDNA phylogeny.** (a) The mtDNA tree was drawn using slow evolving SNPs  
 387 as indicated with the common ancestor haplotype defined as being closest to the ~45,000  
 388 year old Ust'-Ishim. Only major branches are shown and no slow SNPs could be found to  
 389 separate N and R. (b) Genetic distance in slow mtDNA SNPs to Ust'-Ishim mtDNA for  
 390 haplotypes in 1KG. Only the closest few are shown. (c) Genetic distance in slow mtDNA  
 391 SNPs to the M haplotype in BEB, GIH, or CHS for different L haplotypes in the YRI  
 392 group. (d) Genetic distance in slow autosomal SNPs to individuals of South Asian BEB (or  
 393 GIH, STU, ITU, PJI) carrying either the M or N haplotype. Data are means with standard  
 394 deviation. \*\*,  $P < 0.01$ , t test, 2 tailed.

395

### 396 Neanderthals and Denisovans

397 If major human groups have separated ~2 myr ago with region specific features  
 398 developed not long after separation such as shovel shaped teeth in *H. erectus* from  
 399 China (Yuanmou man and Peking man), Neanderthals and Denisovans with features  
 400 more modern than *H. erectus* should be expected to belong to one of the modern groups  
 401 today. However, previous studies have found Neanderthals to be outgroup to AMH and  
 402 used D-statistics to show Neanderthal gene flow into non-Africans but oddly not Africans  
 403 <sup>11,12</sup>. The assumption of D-statistics is that all modern groups are equidistant to  
 404 chimpanzees so that presence of derived alleles (different from chimpanzees) was due to  
 405 gene flow from Neanderthal. If in fact Africans are closer to chimpanzees or carrying  
 406 more ancestral alleles in general, the conclusion of gene flow into non-Africans would  
 407 become invalid. We examined this by measuring genetic distance between 1KG and 10  
 408 previously sequenced chimpanzee genomes <sup>67</sup>. Using the random 255K SNPs set, we  
 409 found closer hom distance between Africans and chimpanzees than between  
 410 non-Africans and chimpanzees (Supplementary Fig. S6). As presence of Neanderthal

411 derived alleles in a non-African are mostly in het state <sup>14</sup>, which could be observed to be  
412 biased toward non-Africans only if Africans are in hom ancestral state, the fact of more  
413 hom ancestral alleles in Africans (or closer hom distance between Africans and  
414 chimpanzees) therefore deems invalid the previous finding of Neanderthal gene flow into  
415 non-Africans. Furthermore, as already noted above for Y and mtDNA trees, the finding of  
416 saturated level of genetic diversity makes the infinite site assumption invalid, which in turn  
417 makes the assignment of ancestral and derived alleles unrealistic. That the D statistics  
418 method may not be appropriate to detect Neanderthal introgression has also been  
419 independently found by others <sup>68</sup>. Thus, the relationship between  
420 Neanderthals/Denisovans and present day populations remains to be determined.

421 Making use of the published Neanderthal genomes <sup>11,12,69</sup>, we calculated the genetic  
422 distance in slow SNPs between 1KG and Neanderthals (Altai, Vindija 33.16, 33.25, 33.26,  
423 and Mezmaiskaya1) or Denisovan (Fig. 4A). These ancient genomes showed closer  
424 distance to Africans except Vi33.25 to ASN and Vi33.26 to AMR. Denisovan was closer  
425 to Africans than Neanderthals were (Fig. 4A). The high coverage genomes of Altai and  
426 Denisovan allowed their African affinity, especially Denisovan, apparent on a principle  
427 component analysis (PCA) plot (Fig. 4B-C). In contrast to the 5 Neanderthals studied  
428 here who were mostly found in Europe and yet were no closer to Europeans or the  
429 related Indians than other groups, their contemporary AMH Ust'-Ishim from Western  
430 Siberia was closest to SAS followed by EUR (Fig. 4). We also studied the more recently  
431 reported Neandethal genomes of Vi33.19, Vi87, Les Z4, GoyetQ56, and Mezmaiskaya2  
432 <sup>6,70</sup> and found them to be also closest to AFR followed by EUR except Vi87 who was  
433 equally related to AFR and SAS (Supplementary Fig. S7). Using the slow SNPs but not  
434 the non-informative SNPs, we also found that two Neanderthals from the same location,  
435 Mezmaiskaya 1 and 2, but separated for ~20 ky were in fact closest to each other than  
436 either was to any other Neanderthals or ancient DNAs of modern humans found  
437 anywhere in the world (Supplementary Fig. S8), thus confirming regional continuity and  
438 invalidating the previous conclusion of Neanderthal population turnovers <sup>6,70</sup>. These  
439 results suggest that Neanderthals and Denisovans were Africans who migrated into  
440 Eurasia and admixed with local non-Africans. The observations of an East Asian like  
441 Neanderthal (Vi33.25) in Europe at >45,000 years ago and of a South Asian like Western  
442 Siberian (Ust'-Ishim) from ~45,000 years ago indicates migration of Asians into Europe  
443 around the time of AMH origin in South East Asia.  
444

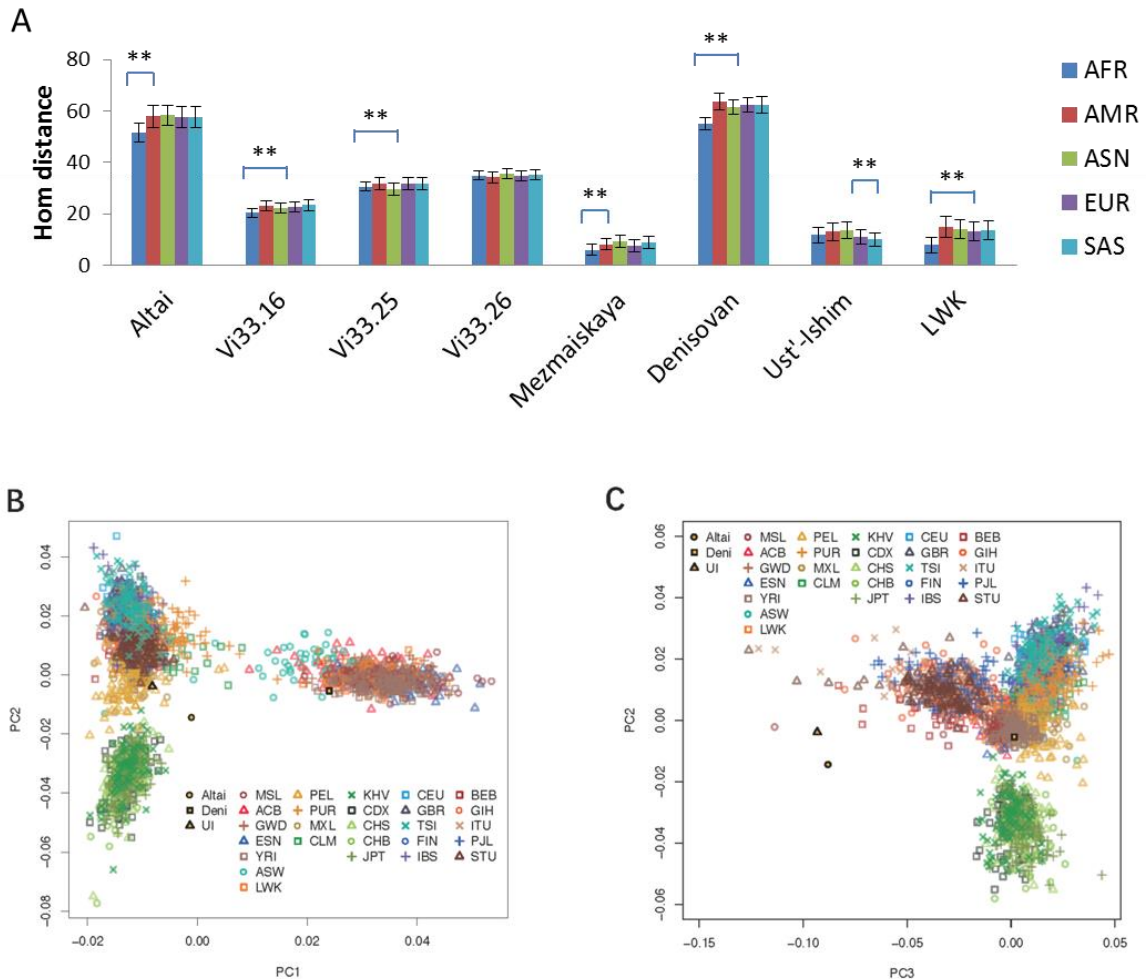

445  
 446 **Figure 4. Autosomal relationship between archaic and modern humans.** (a) Shown  
 447 are the genetic distances between the 5 groups of 1KG and Neanderthals, Denisovan,  
 448 Ust'-Ishim, or the modern African group LWK. Data are means with standard deviation. (b)  
 449 and (c) Shown are PCA plot analyses for Denisovan, the Altai Neanderthal, Ust'-Ishim,  
 450 and 1KG. \*\*, P < 0.01, t test, 2 tailed.

451

452

### 453 **Origins of Negritos and Aboriginal Australians**

454 The Andamanese and the African pygmies seem obviously related in multiple aspects,  
 455 including traits, Y relationship with the African megahaplogroup ABDE, and mtDNA  
 456 haplotype M being closely related to African L. However, previous studies have found  
 457 Andamanese to be even more genetically distant to Africans than other Eurasians<sup>31</sup>.  
 458 Using the published genomes of 10 individuals from the Jarawa (JAR) and Onge (ONG)  
 459 populations in the Andaman Islands<sup>31</sup>, we found that Andamanese are relatively closer to  
 460 Africans or have lower AFR/SAS(-BEB) distance ratio than other nearby populations such  
 461 as BEB, with ONG more so than JAR, consistent with the known less admixture in ONG  
 462 relative to JAR (Fig. 5A). PC analysis also showed Andamanese closer to Africans than  
 463 all five populations of SAS (Fig. 5B). Relative to the distance to SAS, ONG showed  
 464 smaller distance to Mbuti than to San or other Africans examined except LWK (Fig. 5C).  
 465 The Mbuti group here consists of 4 published genomes from the Simons project<sup>62</sup> and

466 the San group consists of 2 published genomes<sup>71</sup>. Given that Andamanese were closer  
 467 to Africans than other Indians were (Fig. 5A) but Mbuti pygmies were not closer to  
 468 Andamanese than some other Africans were, it can be inferred that Andamanese came  
 469 from Mbuti rather than the opposite.  
 470

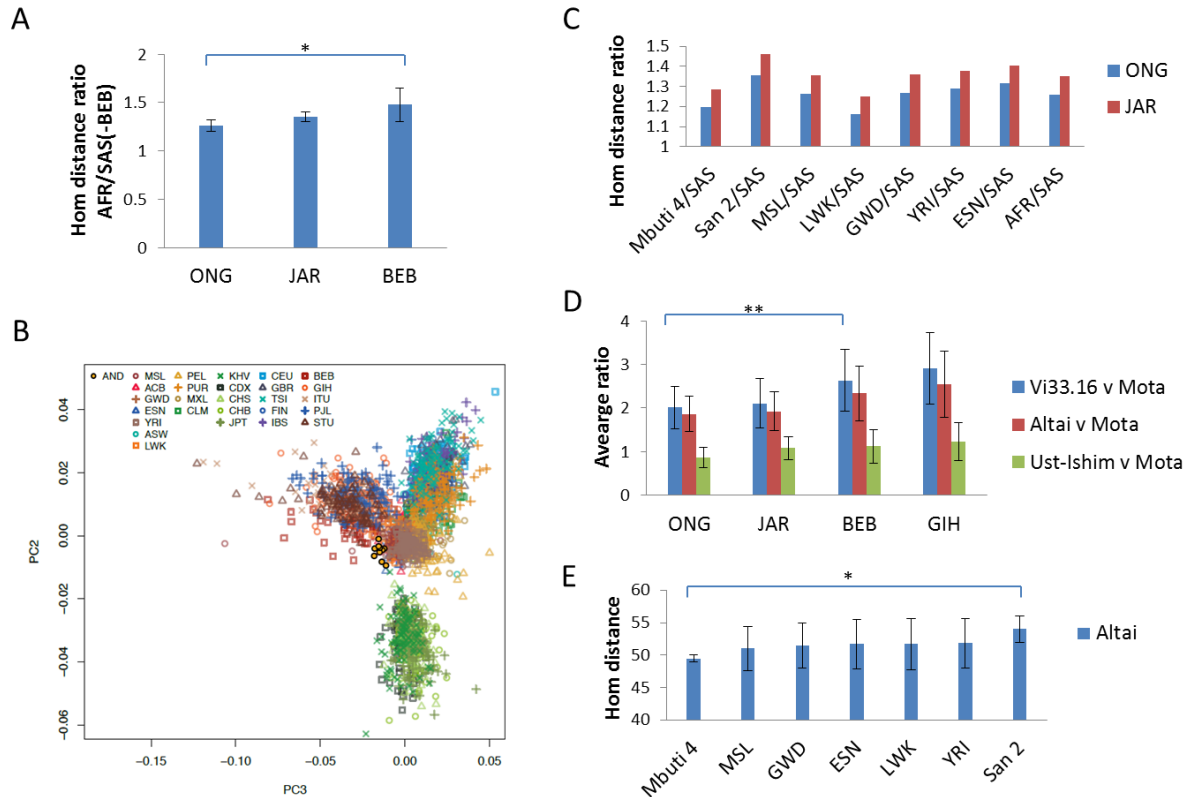

471  
 472 **Figure 5. Origin of Negritos.**(a) Shown are the ratios of ONG, JAR, or BEB autosomal  
 473 distance to AFR versus SAS(-BEB). SAS (-BEB) excluded the BEB group from SAS  
 474 groups. (b) PCA plot (PC3-PC2) analysis of 10 Andamanese and 1KG using slow  
 475 autosomal SNPs. (c) Shown are the ratios of ONG or JAR autosomal distance to African  
 476 groups versus SAS. (d) Hom distance ratio of ancient humans versus the Mota African  
 477 for four South Asian groups (ONG, BEB, GIH, JAR). (e) Autosomal distance between  
 478 Altai and various African groups. Data are means with standard deviation. \*\*, P<0.01, t  
 479 test or chi-squared test, 2 tailed.  
 480

481 The African affinity of Neanderthals prompted us to examine the distance between  
 482 Neanderthals (with relatively higher coverage genomes, Vi33.16 and Altai) and several  
 483 different Indian populations (ONG, JAR, BEB, and GIH) to see if ONG might have come  
 484 from Neanderthals or related humans. Relative to the distance to the ~4500 year old  
 485 African Mota<sup>72</sup>, ONG was closer to Neanderthals Vi33.16 and Altai, as well as to  
 486 Ust'-Ishim who was known to have large amount of Neanderthal admixture, than other  
 487 Indians were (Fig. 5D). Also, if Andamanese came from Neanderthals, Neanderthals  
 488 should be closer to Mbuti than to San and other Africans, since Andamanese are closer  
 489 to Mbuti than to San (Fig. 5C). This was indeed the case for the Altai individual who was  
 490 the only Neanderthal with high coverage genome for this analysis to be informative (Fig.  
 491 5E).

492 Since different Negrito groups in South Asia share similar traits, one expects them to  
493 be genetically related. The new Y tree grouping C with ABDE further suggests a common  
494 ancestry for different Negrito groups since the C haplotype is common in certain Negrito  
495 groups in Philippines while D is common in some others such as Onge. We therefore  
496 made use of a previously published SNPs genotyping data for a number of Oceanian  
497 groups including the Negrito group Mamanwa and its neighboring group Manobo in  
498 Philippines<sup>73</sup>. We measured the ONG/JAR distance ratio to look for the group that is  
499 closest to ONG relative to its neighbor JAR and the Mamanwa/Manobo distance ratio to  
500 look for the group closest to Mamanwa relative to its neighbor Manobo. Of the 13 groups  
501 examined, Mamanwa showed the smallest ONG/JAR distance ratio besides ONG;  
502 conversely, ONG showed the smallest Mamanwa/Manobo distance ratio besides  
503 Mamanwa (Supplementary Fig. S9). These results suggest that the two Negrito groups  
504 are more closely related to each other than either is to other groups as examined here.

505 We also examined the Aboriginal Australian (AUA) samples in the Pugach et al  
506 (2013) dataset and a previously published ~100 year old AUA (AUA\_100yr) who was  
507 unlikely to have admixed with European colonizers<sup>74</sup>. These AUA samples showed lower  
508 Mamanwa/Manobo ratio than other Oceanians (Supplementary Fig. S10). The AUA  
509 samples from Pugach et al (2013) also showed lower AFR/ASN ratio than other  
510 Oceanians, representing 68% of the average ratio for the Oceanians (excluding AUA and  
511 NGH or New Guinea Highlanders). To examine if the African component of AUA had  
512 come from Neanderthals, we calculated the Altai/ASN distance ratio of AUA and found it  
513 to be 64% of the average ratio for the Oceanians in Pugach et al (2013) dataset, which  
514 was significantly lower than the 68% found for AFR/ASN ratio, indicating closer  
515 relationship of AUA to Altai than to AFR. These results showed similarity between AUA  
516 and Negritos, indicating similar ancestry in Neanderthals and Denisovans.

517

### 518 **Testing the out of East Asia model**

519 We next tested certain obvious predictions of the out of East Asia model. First, the model  
520 predicts lower diversity in people directly associated with the original AMH and higher  
521 diversity in people resulting from admixture of AMH with archaic humans. We calculated  
522 the hom PGD in slow SNPs as well as het numbers for each of the 25 groups totaling  
523 2534 individuals in 1KG. The lowest hom PGD level was found in LWK followed by  
524 slightly higher level in CHS (Supplementary Fig. S11A). However, LWK has significantly  
525 higher numbers of het than CHS (Supplementary Fig. S11B). As high level  
526 heterozygosity indicates high genetic diversity and would reduce hom distance, it is likely  
527 that CHS has lower genetic diversity than LWK. We further found that within CHS (made  
528 of 72 individuals from Hunan and 36 from Fujian), Hunan samples have lower hom PGD  
529 and het numbers than Fujian samples (Supplementary Fig. S11CD). These results  
530 indicate that CHS, in particular Hunan people, have lowest genetic diversity levels among  
531 the 25 groups in 1KG. Given that known admixed groups such as MXL and PUR showed  
532 the highest genetic diversity or PGD (Supplementary Fig. S11A), it may be inferred that  
533 CHS or Hunan people may have the least amount of admixture and hence represent the  
534 original AMH group, at least among the 25 groups sampled here. That Africans, as  
535 human ancestor from ~2 myr ago according to the multiregional model, did not show the  
536 highest genetic diversity level may seem unexpected but is in fact consistent with a key  
537 role for admixtures as claimed by the multiregional model as well as our out of East Asia  
538 model here. The original AMH group should have low admixture with archaic people in  
539 order for evolution into AMH to be possible since admixture may reverse AMH back to the  
540 archaic state.

541 Second, we would expect Southern East Asian groups to be closer to Africans.  
 542 Although CHS represent samples collected from Southern China (Hunan and Fujian),  
 543 while CHB samples were from Northern China (Beijing), both in fact contain Southern and  
 544 Northern Chinese. We therefore made use of the Hunan versus Fujian samples in CHS,  
 545 where Fujian people are known to be mostly migrants from Central North China during  
 546 the West Jin, Tang, and Song dynasties. We calculated the distance of each group to  
 547 Hunan or Fujian and obtained the Hunan/Fujian distance ratio of each group.  
 548 Consistently, groups known to have more Northern Chinese admixtures, such as CHB,  
 549 MXL, PEL, JPT, had higher Hunan/Fujian distance ratio than Southern groups such as  
 550 CDX, and KHV (Fig. 6A). Of note, FIN is closest to Hunan people among EUR groups  
 551 ( $P < 0.01$ ), suggesting that North Western migrations of Southern Chinese during the first  
 552 wave of AMH dispersal from Hunan area may have contributed to the ancestry of FIN.  
 553 Consistently, Western hunter-gatherers from the Paleolithic age also showed closer  
 554 distance to Hunan (manuscript in preparation). All AFR groups showed lower  
 555 Hunan/Fujian distance ratio than non-Africans with LWK in East Africa the lowest,  
 556 consistent with migration of Southern Chinese into Africa and into the Horn of Africa first.  
 557 That non-Africans had more Fujian admixtures is consistent with known migrations of  
 558 Northern East Asians into both the West and the America in more recent times during the  
 559 Neolithic and Bronze ages. We further found Hunan people to be relatively closer to  
 560 Africans than other South East Asians such as Chinese Dai in Xishuangbanna (CDX) and  
 561 Kinh in Ho Chi Minh City of Vietnam (KHV) (Fig. 6B), indicating origin of AMH more likely  
 562 in Hunan relative to other nearby regions.

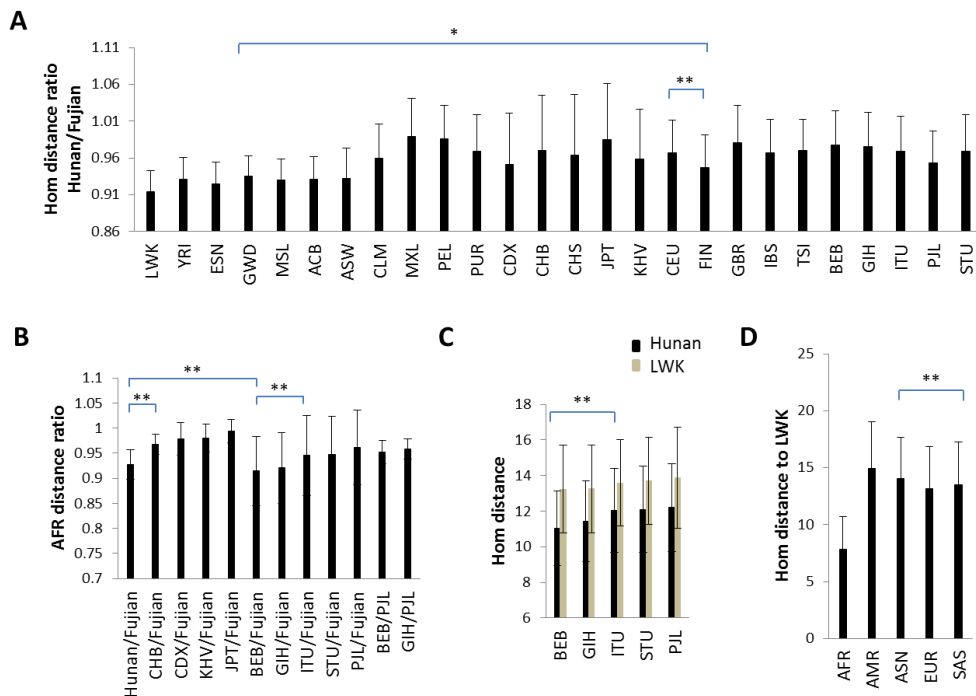

563  
 564  
 565 **Figure 6. Hunan ancestry in Africans.** (a) Ratios of autosomal distance to Hunan  
 566 versus Fujian for each of the 25 groups in 1KG. (b) Ratios of autosomal distance to  
 567 Hunan (or other East Asian and South Asian groups in 1KG) versus Fujian. (c)  
 568 Autosomal distance to Hunan or LWK for various South Asian groups. (d) Autosomal  
 569 distance to LWK for the 5 groups in 1KG. \*\*,  $P < 0.01$ , \*,  $P < 0.05$ , t test or chi-squared test,  
 570 2 tailed.



571

572 Third, as migration of AMH from Hunan via the Southern route to East Africa must  
 573 cross the Indian subcontinent, one would expect closer relationship with Africans for  
 574 groups within South Asia that are more related to Chinese relative to those more related  
 575 to Europeans or more Southern relative to more Northern. Indeed, relative to Fujian  
 576 people, the distance of different Indian groups to Africans follows exactly their direct  
 577 distance to Hunan people, as well as their direct distance to LWK, in the order of  
 578 increasing distance, BEB, GIH, ITU, STU, and PJJ (Fig. 6BC). Also, Gujarati Indians  
 579 (GIH) in Western India is closer to Africans than Punjabi people from Northern Pakistan  
 580 (PJJ) (Fig. 6B). Consistently, relative to PJJ, both BEB and GIH are closer to Africans  
 581 with BEB closer than GIH (Fig. 6B). The observation of lower BEB/Fujian distance ratio  
 582 than Hunan/Fujian is consistent with Indians being in general closer to Africans than East  
 583 Asians (Fig. 6D) and being more recent ancestors to Africans than East Asians based on  
 584 the migration route of the out of East Asia model.

585 Fourth, we hypothesized that the branching process of Y may involve AMH  
 586 hybridization with archaic humans and subsequent adaptive co-evolution of Y and  
 587 admixed autosomes. As the first major split resulted in ABCDE, G, and HIJK haplogroups,  
 588 we tested whether the ABCDE megahaplogroup, whose sub-branches are mostly found  
 589 in Africans and South Asians or Oceanians with African like features, may have resulted  
 590 from admixture of F AMH with admixed archaic Africans such as Neanderthals who may  
 591 have migrated to South East Asia. We examined the Y chr sequences of three  
 592 Neanderthals<sup>6,7</sup>, and found all to share alleles at informative sites with haplotype A0, A,  
 593 AB and ABCDE but not with other non ABCDE haplotypes (Table 3). These results  
 594 further confirmed the African affinity of Neanderthals as shown by autosome analysis  
 595 above and indicated that admixture of F AMH with Neanderthals may have resulted in  
 596 African-like descendants with ABCDE megahaplotype who largely preferred to live in the  
 597 Southern hemisphere. Consistently, East Asians (JPT) with D or C haplotype showed  
 598 closer autosomal distance to Andamanese (also with D haplotype) or African MSL (with E  
 599 haplotype) than those with O haplotype did (Supplementary Fig. S12).

600

601 **Table 3. Sharing of Y chr alleles between Neanderthals and modern humans**

602

| Haplotype | Mezmaiskaya2 |         |          | Spy94 |         |          | El Sidron |         |            |
|-----------|--------------|---------|----------|-------|---------|----------|-----------|---------|------------|
|           | #SNPs        | #Shared | Fraction | #SNPs | #Shared | Fraction | #SNPs     | #Shared | Fraction   |
| A         | 4            | 2       | 0.5      | 1     | 1       | 1        | 4         | 3       | 0.75       |
| A0        | 3            | 3       | 1        |       |         |          | 3         | 2       | 0.66666667 |
| AB        | 2            | 1       | 0.5      |       |         |          | 1         | 1       | 1          |
| ABCDE     | 2            | 2       | 1        | 2     | 2       | 1        | 2         | 2       | 1          |
| B         | 2            | 0       | 0        | 1     | 0       | 0        |           |         |            |
| C         | 4            | 0       | 0        | 2     | 0       | 0        |           |         |            |
| D2        | 8            | 0       | 0        | 3     | 0       | 0        |           |         |            |
| E         | 14           | 0       | 0        | 7     | 0       | 0        | 1         | 1       | 1          |
| G         | 3            | 0       | 0        | 4     | 0       | 0        | 1         | 0       | 0          |
| H1        | 8            | 0       | 0        | 7     | 0       | 0        |           |         |            |
| I1        | 3            | 0       | 0        | 2     | 0       | 0        |           |         |            |
| IJ        | 2            | 0       | 0        |       |         |          |           |         |            |
| J         | 2            | 0       | 0        |       |         |          |           |         |            |
| L         | 2            | 0       | 0        | 2     | 0       | 0        |           |         |            |
| LT        | 3            | 0       | 0        |       |         |          |           |         |            |
| N         | 4            | 0       | 0        | 2     | 0       | 0        |           |         |            |
| O         | 12           | 0       | 0        | 5     | 0       | 0        |           |         |            |
| QR        | 3            | 0       | 0        |       |         |          | 1         | 0       | 0          |
| Q         |              |         |          | 1     | 0       | 0        |           |         |            |
| R1a       | 12           | 0       | 0        | 2     | 0       | 0        | 1         | 0       | 0          |
| T         | 9            | 0       | 0        | 6     | 0       | 0        |           |         |            |

603

604

605

606 Fifth, to similarly test whether mtDNA diversification from the original ancestor type  
607 to more African type may involve AMH hybridization with archaic humans, we examined  
608 the distance between archaic and modern mtDNAs in slow SNPs (Supplementary Table  
609 S10). Although archaic mtDNAs were nearly equidistant to the modern group consisting  
610 of Europeans (CEU), East Asians (CHS), and Africans (LWK), they were closer to  
611 Africans in SNPs found in archaic humans (sites that differ between archaic mtDNA and  
612 the rCRS), indicating more sharing of archaic alleles in Africans (Supplementary Fig.  
613 S13). This is likely due to independent adaptive mutations since archaic mtDNAs are  
614 outgroups to modern mtDNAs as previous studies have shown. We also confirmed it by  
615 showing that the average distance between archaic and modern mtDNAs were larger  
616 than that within modern mtDNAs (Supplementary Fig. S14A). The archaic mtDNAs are at  
617 least of two types, with Neanderthal Vi33.16 and Altai belonging to one type or being  
618 close to each other than to other archaic mtDNAs while Denisovan and Heidelbergensis  
619 belonging to another type (Supplementary Fig. S14B). Such results support the notion of  
620 multiple turnover events in mtDNA types in the past ~2 myr of modern human evolution.

621 Our results here confirmed the first mtDNA tree ever built that placed the original  
622 AMH type (type 1 morph) in East Asia<sup>25</sup>. Our original type here is defined by the major  
623 alleles of 6 slow SNPs, 750, 1438, 2706, 8860, 14766, 15326 (Vi33.16 and Altai have all  
624 6 except 2706, Denisovan has 14766 and 15326, and Heidelbergensis has 14766 and  
625 1438). The earliest AMH Ust'-Ishim had the major alleles of these 6 SNPs and no  
626 additional slow SNPs. Mutation at 14766 defines V and VH and further mutation at 2706  
627 defines H (Supplementary Fig. S4A). All other haplotypes overwhelmingly carry the major  
628 alleles of these 6 sites plus a few additional less common slow SNPs. We calculated the  
629 number of slow SNPs in each haplotype found in the 1KG and found R0 of Chinese to  
630 have the least amount among all non VH haplotypes, supporting R0 as the original type  
631 (Supplementary Fig. S15 and Table S11).

632 We examined whether the amount of allele sharing with archaic mtDNAs supports  
633 the above results linking archaic humans with South Asians or Oceanians. Using  
634 PhyloTree17 and Mitoweb data, we identified all non-L haplotypes that share alleles with  
635 archaic mtDNAs and calculated the number of shared alleles in each haplotype  
636 (Supplementary Table S12, Supplementary Information S4). Among R and N haplotypes,  
637 P4b1, R7a, J1b, and W3 were the most enriched with archaic alleles (4 alleles), which are  
638 common in Oceanians or Arabians/Caucasians/South Asians. Among M haplotypes  
639 (excluding L), G4, M17a, M27a, M76a, and M7b1a2a1a were the most enriched with  
640 archaic alleles (5 alleles), which are common in native Japanese, South East Asians,  
641 Papuans, and Indians. The M haplotype with the least amount of archaic alleles is D5 (1  
642 allele), which is most common in Chinese.

643 We next calculated the distance of each modern haplotype in 1KG to archaic  
644 mtDNAs as measured by either slow or fast SNPs found in archaic genomes, and  
645 assigned each a distance ranking (Supplementary Fig. S16 and S17, Supplementary  
646 Table S13). Haplotype L0 commonly found in San people was the closest to archaic  
647 mtDNAs, consistent with the Neanderthal affinity with Y haplotype A. Haplotype G2 of  
648 JPT and M5a of SAS were top ranked non-L haplotypes in distance to Heidelbergensis in  
649 slow SNPs, consistent with the known admixed phenotypes of native Japanese and S.  
650 Asians. Relative to G2 that is common in South Asians and Tibetans, G1 is common in  
651 Russian far East and consistently closer to Altai in fast SNPs, indicating an adaptive role  
652 for fast SNPs. Consistent with the expected routes of human entry into America, D1  
653 common in Amerindians and Paleoamericans is closest to Altai in both slow and fast  
654 SNPs among the 4 archaic mtDNAs. As expected, haplotypes common in African groups

655 such as U6 and L3e are closer in slow SNPs to more African type archaic mtDNAs of  
656 Denisovan/Heidelbergensis, whereas those of Amerindians such as D1, D4 and A2 are  
657 closer to Neanderthals (Supplementary Table S14). Such analyses further indicate  
658 possible effects of archaic admixtures, with G2, I, T, and X2 affected by  
659 Denisovan/Heidelbergensis, and J, K2, and W by Neanderthals.

660 We next merged 1KG data with the AUA specific P4b1 and the Andamanese  
661 enriched M31a and found these haplotypes ranked among the top 13 in slow distance to  
662 Heidelbergensis (but 84th in fast SNPs), just following G and M5a among non-L  
663 haplotypes (Supplementary Fig. S18). Furthermore, they are uniquely much closer to  
664 Heidelbergensis/Denisovan than to Altai, consistent with being uniquely related to  
665 Denisovan among living people today.

666 As M is defined by 10398G and 8701G, both present in archaic humans, it likely  
667 resulted from admixture of R0 with archaic Africans. While the effect of archaic humans  
668 can also be observed for some haplotypes within R and N, the M haplogroup may be the  
669 most affected as indicated by its defining SNPs and the extensive sharing of alleles  
670 between L (now within M) and archaic humans. Consistently, the ~40000 year old  
671 Romanian Oase 1 had extensive Neanderthal admixture and carried an unusual N with  
672 the 8701G allele, indicating clear Neanderthal effect on its mtDNA <sup>13</sup>. The Oase 1 mtDNA  
673 may be an intermediate in the transition from N/R to M. A modern N haplotype with  
674 8701G allele is N21 common in Malays.  
675

## 676 Discussion

677 We have arrived at a new model of modern human origins based on a more complete  
678 understanding of genetic diversity (Fig. 7b). While the autosomes in our model are largely  
679 consistent with the multiregional hypothesis, the mtDNA and Y have a single origin in  
680 East Asia. We also identified Negritos and Aboriginal Australians as direct descendants  
681 of Neanderthals/Denisovans who were African migrants with Eurasian admixtures.

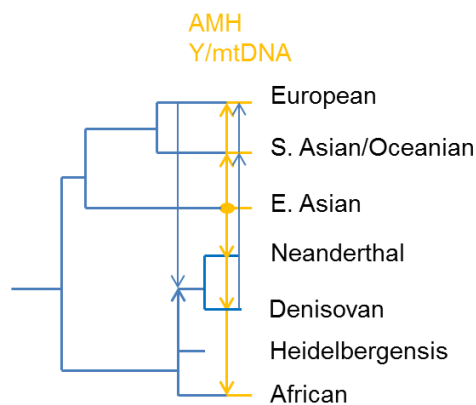

682  
683

684 **Figure 7. Model of human evolution.** A schematic tree showing the phylogenetic  
685 relationship of major human groups, including Africans, East Asians, South  
686 Asians/Oceanians, Europeans, Heidelbergensis, Neanderthals, and Denisovans.

687

688 The nonsyn SNPs in slow genes as defined here are neutral. They are not  
689 deleterious and unlike the stop codon and splicing SNPs. They are also not under  
690 positive selection as positively selected genes tend to be fast evolving. To the dramatic

691 difference between slow and fast evolving DNAs as shown here, we cannot come up with  
692 a meaningful explanation using any known schemes other than the MGD theory <sup>32</sup>. In  
693 highly conserved proteins, most mutations may hit functional sites and be negatively  
694 selected, and it would take many mutations and hence a long time before a neutral site is  
695 hit, thus giving the appearance of a slow mutation rate.

696 We have shown that there are only three major human groups, Africans, East Asians,  
697 and Europeans/Indians. Indians appear to give rise to Europeans as the oldest AMH  
698 Ust'-Ishim was Indian. Also, the Y haplotype H of Indians diverged before diversification  
699 of European haplotypes, which is consistent with our model as well as the  
700 non-inhabitability of Europe during the Last Glacial Period. Aboriginal Australians and the  
701 related Negritos, traditionally viewed as the fourth major group, in fact consist largely  
702 European/Indian and African genomes and their unique traits might have come from  
703 admixture of incoming Neanderthals with local archaic humans. Our calculation showed  
704 that the first major split of humans occurred 1.91-1.96 myr ago, well consistent with fossil  
705 evidence for the presence of *Homo* in Eurasia and the multiregional model. The  
706 coexistence at ~1.76 myr ago in Africa of both Olduvian and Acheulean technologies  
707 suggests the coexistence of multiple groups of humans distinguished by separate  
708 stone-tool-making behaviors <sup>75,76</sup>. The sudden appearance of Acheulean technologies  
709 and pro-Neanderthals at ~0.5 myr ago in Europe (Sima de los Huesos site of Atapuerca)  
710 can now be explained by a more recent out of Africa migration by the ancestors of Mbuti  
711 people <sup>77,78</sup>.

712 Mitochondrial DNA (mtDNA) and the non-recombination region of Y chr (NRY) lack  
713 recombination and provide records of history that are independent of autosomes. Most  
714 SNPs in these DNAs can be proven to be under selection, e.g. certain SNPs or  
715 haplotypes of mtDNA or Y chr are known to be related to human diseases or compatibility  
716 with nuclear genomes <sup>37,79-83</sup>. Sharing of alleles of mtDNA or Y chr should mean similar  
717 selection, reflecting both environments and physiology or primarily physiology when  
718 saturation has been reached. Sharing of physiology should be informative for a phonetic  
719 approach of phylogeny. Coevolution of mtDNA, Y, and autosomes has been found by  
720 many previous studies <sup>37,83-86</sup>, which may play a key role in the diversification into multiple  
721 haplotypes during AMH radiation from its place of origin to other regions by hybridization  
722 with archaic humans. People who have stayed relatively unchanged in physiology and  
723 living environments from the ancestor would be expected to have few deviations from the  
724 ancestor haplotype and their present day living place would indicate place of origin for the  
725 ancestor. It is through such reasoning that we have come to place the origin of modern Y  
726 and mtDNA in East Asia or South China. Our results showed that groups with the same Y  
727 or mtDNA haplotypes are also closer in autosomes and traits. The Y megahaplogroup  
728 ABCDE matches with the mtDNA megahaplogroup M. Such *a priori* sensible results  
729 provide strong independent validation for our new phylogenetic method.

730 Given that most SNPs in Y and mtDNA are not neutral, one cannot use the molecular  
731 clock approach to determine the age of the haplotypes except for recent diversifications.  
732 We can only estimate the age of modern Y or mtDNA at ~50,000 years based on the first  
733 fossil appearance of AMH and the disappearance of Neanderthals. That the Y haplotype  
734 NO of the ~45,000 year old Ust'-Ishim differs from the putative ancestor F by only ~27  
735 SNPs whereas a present day haplotype could differ from the F ancestor by as much as  
736 ~740 SNPs (Fig. 2) indicates that the ancestor F should not be much older than ~45,000  
737 years. This relatively young age is remarkably consistent with the time point for the  
738 replacement of Neanderthals by AMH but appears to contradict the oldest AMH fossils in  
739 Africa or in Hunan China <sup>19</sup>. However, nearly all AMH fossils older than 40,000 years still  
740 have certain archaic features and independent evolution of modern features has been

741 noted to occur periodically over the past 950,000 years since the time of *H.*  
742 *antecessor*<sup>4,87</sup>.

743 The novel concept here of modern replacing archaic versions of Y and mtDNA but  
744 not autosomes is key to our model of out of East Asia. The lack of recombination in Y and  
745 mtDNA makes this idea biologically inevitable. The fact that Heidelbergensis, Denisovans,  
746 Neanderthals, and AMH all have distinct mtDNAs suggests that such replacements may  
747 have taken place multiple times in the past. Modern examples consistent with the  
748 replacement idea are the dominant presence of Asian Z mtDNA in the Saami people of  
749 Northern Europe and the wide presence of Asian Y haplotype N in Finnish, who are  
750 otherwise largely indistinguishable from Europeans in both autosomes and traits. Also  
751 consistent is the finding of three super-grandfather Y haplotypes in China that are  
752 relatively young in age (~5000-7000 years) but account for ~40% of Han Chinese males  
753 today<sup>88,89</sup>. Admixture of incoming Asian AMH with archaic humans in Europe or Africa  
754 would lead to haplotype diversification in Y and mtDNA while still maintaining regional  
755 specificity in autosomes and hence traits as traits are mostly determined by autosomes.  
756 Therefore, the multiregional model is fully compatible with any single origin model of  
757 mtDNA or Y chr and there is no real conflict between the timing of autosome  
758 diversification and the much more recent appearance of the modern mtDNA and Y chr.

759 The ~45,000-year-old AMH Ust'-Ishim from Siberia was previously found to have left  
760 no descendants among present populations and to be more related to East Asians than  
761 to Europeans/Indians<sup>14</sup>. However, our results showed this individual as Indians. This  
762 discrepancy is to be expected. It has been routinely found as surprising in previous  
763 studies on ancient DNAs that there is no genetic continuity between ancient and present  
764 day people. Such unexpected anomalies can now be understood as artifacts of using  
765 non-informative SNPs. We have verified this for most ancient European DNAs that while  
766 non-informative SNPs placed them as outliers, the slow SNPs as defined here all placed  
767 them as indistinguishable from present day Europeans.

768 Our finding of Neanderthals and Denisovans as primarily Africans with Eurasian  
769 admixture is well supported by fossil data indicating *H. heidelbergensis*, present in both  
770 Africa and Europe, as ancestors of Neanderthals. The taurodont teeth are common in  
771 Neanderthals, Heidelbergensis and certain South African fossils<sup>90</sup>. The occipital bunning  
772 of Neanderthals are also common in modern Africans<sup>91</sup>. Neanderthals are known to  
773 share multiple traits with Europeans such as the prominent shape and size of the nose  
774<sup>30,92</sup>, which supports our finding that Europeans are often genetically the closest to  
775 Neanderthals (2/3 examined here) after Africans. Our result that Denisovan is nearly  
776 equally related to East Asians and Europeans (slightly more related to East Asians) is  
777 consistent with where Denisovan was found. Seemingly unexpectedly, certain  
778 Neanderthals found in Europe is most closely related to Asians (Vi33.25) or Americans  
779 (Vi33.26), and one of the three Neanderthals closest to Africans was closer to East  
780 Asians than to Europeans. However, this would be expected if Africans associated with  
781 the Neanderthal exit had entered Asia or South Asia via the Northern route from Siberia  
782 or possibly a Southern route. The general lack of Neanderthal fossils in this Southern  
783 route may reflect the relatively small effort so far invested in this region (with only few  
784 *Homo* fossil finds like Narmada from ~200 kya who is broadly classified as *H.*  
785 *heidelbergensis*). Indeed several fossils in China show Neanderthal features such as the  
786 inner-ear formation in the ~100 ky old *Xujiayao* and *Xuchang Man*<sup>4,93-95</sup>. Certain  
787 mysterious Southern China fossils such as the 11 -15.5 ky old 'Red Deer Cave' people  
788 with hybrid features of modern and archaic humans may also be candidates for Asian  
789 relatives of Neanderthals, especially considering their taurodont teeth<sup>96</sup>. Early modern  
790 human fossils with typical Mongoloid features in South West China (Liujiang, Ziyang,

791 Lijiang, and Chuandong) also have weak occipital buns commonly found in Neanderthals  
792 <sup>4,94,97</sup>. Mousterian stone tools commonly associated with Neanderthals also existed in  
793 Shuidonggou and Chenggong in South West China <sup>4,98</sup>. Thus, although Neanderthals  
794 were mostly found in Europe and Middle East, they likely also made their way to North  
795 East Asia (Denisovan and Teshik-Tash) and South East Asia <sup>99</sup>.

796 Fossils or traits indicating AMH migration from East Asia into Africa or Europe have  
797 been noted before. First, native Africans such as Khoisans are well known to have certain  
798 East Asian features such as shoveling teeth, epicanthic fold, and lighter skins. Mbuti  
799 pygmies look very much like the Andamanese. The much lower frequency of shoveling  
800 teeth in African fossils and Khoisan relative to ancient and modern Chinese suggests that  
801 this type of teeth could only originate in China with its African presence due to migration.  
802 The type of shoveling teeth found in Neanderthals and Pleistocene *Homo* from  
803 Atapuerca-Sima de los Huesos may either be a different type from that of Asians and  
804 Africans or come from early disposal of *Homo* from Asia to Europe <sup>100,101</sup>. Second, a  
805 combination of three features has been noted to be region-specific to China fossils with  
806 lower frequency also found in North Africa: a non-depressed nasal root, non-projecting  
807 perpendicularly oriented nasal bones and facial flatness <sup>102</sup>. Third, Dali man of China  
808 (~260 kya) had lower upper facial index and flat nasomolar angle, but these two modern  
809 features only first appeared in Europe in Cro Magnons (Xinzhi Wu, personal  
810 communication).

811 That humans have been a single species for more than ~2 myr is consistent with the  
812 unique feature of being human, i.e., creativity, which could be defined as constant  
813 creation of novelty. Intentionally made and constantly improved knife type stone tools,  
814 first appeared 2.3-2.8 myr ago, may be beyond the capabilities of non-humans and mark  
815 the first appearance of creativity in life on Earth.

816 The appearance of modern humans should be accompanied by new technologies  
817 just as the knife type stone tools were associated with the first appearance of the genus  
818 *Homo*. A technology just one step more advanced than stone tools is pottery making.  
819 Consistent with our model, the earliest pottery making intended for practical usage was  
820 found in Hunan and the neighboring Jiangxi in South China at 18,000-20,000 years ago  
821 <sup>103,104</sup>. While future investigations could extend the time even earlier, one should not  
822 expect a new technology to appear simultaneously with the first appearance of AMH  
823 since it would take time for the first modern humans to grow into a large enough  
824 population to be able to invent new cultures. It is also remarkable to note that the next  
825 new invention after pottery, rice or agriculture, also likely came from Hunan <sup>105</sup>. Hunan is  
826 also the site of early AMH fossils in Asia <sup>19</sup>. Placing AMH origin in China is also in line with  
827 the observation that the best argument for regional continuity has been built using data  
828 from China <sup>4</sup>. The observation here that different modern Chinese people could have  
829 independent genetic lineages separated by hundreds of thousands of years is consistent  
830 with the morphological observation that *H. erectus* and *H. sapiens* in Northern China are  
831 not identical to those in Southern China <sup>106</sup>. Among all East Asians examined here, the  
832 genomes of Hunan people were found most enriched in Africans. Therefore, our model of  
833 modern human origins in East Asia, in particular Hunan Province in China, provides a  
834 satisfying account of all relevant data including the human specific trait of creativity and  
835 the related inventions.

836 The study here shows different genetic diversity levels in different human groups  
837 depending on different types of SNPs. Europeans show the lowest genetic diversity level  
838 in stop codon and splicing SNPs while Africans the highest, which has also been found in  
839 a recent study <sup>107</sup>. However, East Asians show the lowest genetic diversity in genome  
840 average and hence in non-coding sequences. Thus, different populations encounter

841 different selective pressures, the precise nature of which would require future research.  
842 Already, however, some tentative hints emerge on the genetic basis of certain complex  
843 traits that are commonly thought to be culturally shaped. The difference in selective  
844 pressure on non-coding or regulatory regions versus proteins or parts is reminiscent of  
845 the thinking style difference between the East and West in philosophy and medicine, i.e.,  
846 the holistic versus the analytical<sup>108</sup>. The high genetic diversity of Africans also confers  
847 adaptive advantages as in high diversity in immunity<sup>109</sup>.

848 The MGD theory provides a more complete understanding of the long standing  
849 puzzle of what determines genetic diversity, which makes inferring human origins from  
850 genetic diversity patterns realistically possible. By better identification of phylogenetically  
851 informative genes and constraining Neutral theory application to these genes, we provide  
852 strong molecular evidence for multiregional evolution of autosomes and for East Asia  
853 origin of modern Y and mtDNA. Further work utilizing the MGD theory is ongoing and may  
854 yield more surprising and yet satisfying results in human evolution.

855  
856

## 857 **Materials and Methods**

858 **Sequence download.** We downloaded ancient and modern human genome sequences  
859 using publically available accession numbers. South Asian and Oceanian SNPs data  
860 from Pugach et al (2013) were obtained from the authors<sup>73</sup>. The Hunan and Fujian  
861 identity information of CHS sample of 1KG were obtained from the Coriell Institute  
862 website.

863  
864 **Selection of SNPs.** *Random selection of 255K SNPs as fast evolving SNPs.* We  
865 selected 255K SNPs from 1KG data to represent the average variation of the genome  
866 (Supplementary Table S1). We first generated a random number for each SNP on a  
867 given chromosome followed by sorting the SNPs based on the random numbers, and  
868 then selected the top ranked set of SNPs with the number of SNPs in the set proportional  
869 to the size of the chromosome. SNPs from the slow set were removed. No consideration  
870 for SNP frequency was applied.

871  
872 **Slow evolving SNPs.** The identification of slow evolving proteins and their associated  
873 SNPs were as previously described<sup>52</sup>. Briefly, to obtain non-synonymous SNPs located  
874 in the slowest evolving genes, we collected the whole genome protein data of Homo  
875 sapiens (version 36.3) and Macaca mulatta (version 1) from the NCBI ftp site and then  
876 compared the human protein to the monkey protein using local BLASTP program at a  
877 cut-off of 1E-10. We only retained one human protein with multiple isoforms and chose  
878 the monkey protein with the most significant E-value as the orthologous counterpart of  
879 each human protein. The aligned proteins were ranked by percentage identities. Proteins  
880 that show the highest identity between human and monkey were considered the slowest  
881 evolving (including 423 genes > 304 amino acid in length with 100% identity and 178  
882 genes > 1102 amino acid in length with 99% identity between monkey and human). We  
883 downloaded the 1KG phase 3 data and assigned SNP categories using ANNOVAR. We  
884 then picked out the nonsyn SNPs located in the slow evolving set of genes  
885 (Supplementary Table S2).

886

887 **Calling SNPs from genome sequences.** We used publically available software  
888 SAMTOOLS, GATK, and VCFTOOLS to call SNPs from either downloaded BAM files or  
889 BAM files we generated based on downloaded fastq data <sup>110-112</sup>.

890  
891 **Analysis of shared and unique SNPs.** Shared and unique SNPs were identified by  
892 using downloaded allele frequency information from 1KG.

893  
894 **Imputation.** Because commonly used SNPs chips for genome wide genotyping have  
895 only a fraction of the slow SNPs defined here, we performed imputation to obtain more  
896 coverage of the slow SNPs on the South Asian and Oceanian datasets of Pugach et al  
897 (2013). We used the SHAPEIT2 software to do phasing for the SNP chip data <sup>113</sup> and the  
898 IMPUTE2 software to impute based on 1KG data <sup>114</sup>.

899  
900 **Genetic distance calculation.** We used the custom software, dist, to calculate pairwise  
901 genetic distance (PGD) or number of SNP mismatches from SNP data <sup>52</sup>. This software is  
902 freely available at <https://github.com/health1987/dist> and has been described in detail in  
903 previous publications <sup>35,115</sup>. We obtained PGD for each of the 25 human groups in the  
904 1KG data and obtained average PGD per group for groups within each of the 5 major  
905 continents as represented by the 1KG. We excluded highly admixed groups ASW, ACB,  
906 CLM, and PUR in calculating the continental average.

907  
908 **PC analysis.** We utilized GCTA to analyze data in the PLINK binary PED format to  
909 generate two files (\*.eigenvec and \*.eigenva). We drew PCA plot using \*.eigenvec file  
910 <sup>116,117</sup>. One sample BEB\_HG04131 was found on PC2-PC3 plot to be an outlier and was  
911 hence excluded from the PC analysis and most distance calculations presented here.

912  
913 **Other methods.** Other common statistical methods used were Student's t test, chi  
914 square test, and Fisher's exact test, 2 tailed.

915  
916

#### 917 **Acknowledgements:**

918 We thank Shuhua Xu, Xitong Lu, Denghui Luo, Jie Liang and Xiaohua Tan for  
919 technical assistance. We thank Xinzhi Wu for sharing unpublished work. We are grateful  
920 to Mark Stoneking, Irina Pugach, David Reich, Joseph Pickrell, Arti Tandon, Sarah  
921 Tishkoff, Joseph Lachance, Philip Johnson, and Brenna Henn for sharing DNA datasets.  
922 Although not all analyses of these datasets were presented here, they have been helpful  
923 to make this work possible. We thank Xinzhi Wu, German Dziel, and Joseph Daniels  
924 for critical reading of the manuscript. We thank Feng Gao, Xing Gao, Yamei Hou, Wu Liu,  
925 Erik Trinkaus, Lingxia Zhao, and Changqing Zeng for valuable discussions. Supported by  
926 the National Natural Science Foundation of China grant 81171880, the National Basic  
927 Research Program of China grant 2011CB51001, and the Furong Scholars program (S.  
928 H.).

929

#### 930 **Author contributions:**

931 SH and DY designed the study. DW and JY identified the slow evolving proteins. DY,  
932 XL, YG, ZZ, and SH performed data analyses. SH and DY wrote the manuscript and all  
933 authors made comments.

934

#### 935 **Financial Interest statements:**



936 The authors declare that they have no competing interests that might be perceived to  
937 influence the results and/or discussion reported in this paper.

## 938 **References:**

- 939 1 Stringer, C. B. & Andrews, P. Genetic and fossil evidence for the origin of modern  
940 humans. *Science* **239**, 1263-1268 (1988).
- 941 2 Thorne, A. G. & Wolpoff, M. H. Regional continuity in Australasian Pleistocene  
942 hominid evolution. *Am J Phys Anthropol* **55**, 337-349 (1981).
- 943 3 Wolpoff, M. H., Wu, X. Z. & Thorne, A. G. *Modern homo sapiens origins: a general*  
944 *theory of hominid evolution involving the fossil evidence from east Asia.* 411-483  
945 (Alan R. Liss, 1984).
- 946 4 Wu, X. On the origin of modern humans in China. *Quaternary International* **117**,  
947 131-140 (2004).
- 948 5 Blum, M. G. & Jakobsson, M. Deep divergences of human gene trees and models of  
949 human origins. *Mol Biol Evol* **28**, 889-898, doi:10.1093/molbev/msq265 (2011).
- 950 6 Hajdinjak, M. *et al.* Reconstructing the genetic history of late Neanderthals. *Nature*  
951 **555**, 652-656, doi:10.1038/nature26151 (2018).
- 952 7 Mendez, F. L., Poznik, G. D., Castellano, S. & Bustamante, C. D. The Divergence of  
953 Neandertal and Modern Human Y Chromosomes. *Am J Hum Genet* **98**, 728-734,  
954 doi:10.1016/j.ajhg.2016.02.023 (2016).
- 955 8 Thomson, R., Pritchard, J. K., Shen, P., Oefner, P. J. & Feldman, M. W. Recent  
956 common ancestry of human Y chromosomes: evidence from DNA sequence data.  
957 *Proc Natl Acad Sci U S A* **97**, 7360-7365 (2000).
- 958 9 Wilder, J. A., Kingan, S. B., Mobasher, Z., Pilkington, M. M. & Hammer, M. F. Global  
959 patterns of human mitochondrial DNA and Y-chromosome structure are not  
960 influenced by higher migration rates of females versus males. *Nat Genet* **36**,  
961 1122-1125, doi:10.1038/ng1428 (2004).
- 962 10 Cann, R. L., Stoneking, A. C. & Wilson, A. C. Mitochondrial DNA and human  
963 evolution. *Nature* **325**, 31-36 (1987).
- 964 11 Green, R. E., Krause, J., *et al.* A draft sequence of the Neandertal Genome.  
965 *Science* **328**, 710-722 (2010).
- 966 12 Meyer, M. *et al.* A High-Coverage Genome Sequence from an Archaic Denisovan  
967 Individual. *Science*, doi:10.1126/science.1224344 (2012).
- 968 13 Fu, Q. *et al.* An early modern human from Romania with a recent Neanderthal  
969 ancestor. *Nature* **524**, 216-219, doi:10.1038/nature14558 (2015).
- 970 14 Fu, Q. *et al.* Genome sequence of a 45,000-year-old modern human from western  
971 Siberia. *Nature* **514**, 445-449, doi:10.1038/nature13810 (2014).
- 972 15 Vernot, B. & Akey, J. M. Resurrecting surviving Neandertal lineages from modern  
973 human genomes. *Science* **343**, 1017-1021, doi:10.1126/science.1245938 (2014).
- 974 16 Hublin, J. J. *et al.* New fossils from Jebel Irhoud, Morocco and the pan-African origin  
975 of Homo sapiens. *Nature* **546**, 289-292, doi:10.1038/nature22336 (2017).
- 976 17 White, T. D. *et al.* Pleistocene Homo sapiens from Middle Awash, Ethiopia. *Nature*  
977 **423**, 742-747 (2003).
- 978 18 Mendez, F. L. *et al.* An African American paternal lineage adds an extremely ancient  
979 root to the human Y chromosome phylogenetic tree. *Am J Hum Genet* **92**, 454-459,  
980 doi:10.1016/j.ajhg.2013.02.002 (2013).
- 981 19 Liu, W. *et al.* The earliest unequivocally modern humans in southern China. *Nature*  
982 **526**, 696-699, doi:10.1038/nature15696 (2015).

- 983 20 Li, Z. Y. *et al.* Late Pleistocene archaic human crania from Xuchang, China. *Science*  
984 **355**, 969-972 (2017).
- 985 21 Zhao, L. *et al.* New discovery of human fossils and associated mammal faunas in  
986 Bijie Guizhou. *Acta Anthropologica Sinica* **35**, 24-35 (2016).
- 987 22 Athreya, S. & Wu, X. A multivariate assessment of the Dali hominin cranium from  
988 China: Morphological affinities and implications for Pleistocene evolution in East Asia.  
989 *Am J Phys Anthropol* **164**, 679-701, doi:10.1002/ajpa.23305 (2017).
- 990 23 Hershkovitz, I. *et al.* The earliest modern humans outside Africa. *Science* **359**,  
991 456-459, doi:10.1126/science.aap8369 (2018).
- 992 24 Groucutt, H. S. *et al.* Homo sapiens in Arabia by 85,000 years ago. *Nature ecology &*  
993 *evolution* **2**, 800-809, doi:10.1038/s41559-018-0518-2 (2018).
- 994 25 Johnson, M. J., Wallace, D. C., Ferris, S. D., Rattazzi, M. C. & Cavalli-Sforza, L. L.  
995 Radiation of human mitochondria DNA types analyzed by restriction endonuclease  
996 cleavage patterns. *J Mol Evol* **19**, 255-271 (1983).
- 997 26 Leffler, E. M. *et al.* Revisiting an old riddle: what determines genetic diversity levels  
998 within species? *PLoS Biol* **10**, e1001388, doi:10.1371/journal.pbio.1001388 (2012).
- 999 27 Hahn, M. W. Toward a selection theory of molecular evolution. *Evolution* **62**, 255-265,  
1000 doi:10.1111/j.1558-5646.2007.00308.x (2008).
- 1001 28 Kreitman, M. The neutral theory is dead. Long live the neutral theory. *Bioessays* **18**,  
1002 678-683; discussion 683, doi:10.1002/bies.950180812 (1996).
- 1003 29 Ohta, T. & Gillespie, J. H. Development of Neutral and Nearly Neutral Theories.  
1004 *Theoretical population biology* **49**, 128-142 (1996).
- 1005 30 Wolpoff, M. H. & Caspari, R. *Race and Human Evolution: A Fatal Attraction*.  
1006 (Simon & Schuster, 2007).
- 1007 31 Mondal, M. *et al.* Genomic analysis of Andamanese provides insights into ancient  
1008 human migration into Asia and adaptation. *Nat Genet* **48**, 1066-1070,  
1009 doi:10.1038/ng.3621 (2016).
- 1010 32 Huang, S. New thoughts on an old riddle: What determines genetic diversity within  
1011 and between species? *Genomics* **108**, 3-10, doi:10.1016/j.ygeno.2016.01.008  
1012 (2016).
- 1013 33 Zhu, Z., Lu, Q., Wang, J. & Huang, S. Collective effects of common SNPs in foraging  
1014 decisions in *Caenorhabditis elegans* and an integrative method of identification of  
1015 candidate genes. *Sci. Rep.*, doi:10.1038/srep16904 (2015).
- 1016 34 Zhu, Z., Yuan, D., Luo, D., Lu, X. & Huang, S. Enrichment of Minor Alleles of  
1017 Common SNPs and Improved Risk Prediction for Parkinson's Disease. *PLoS ONE*  
1018 **10**, e0133421, doi:10.1371/journal.pone.0133421 (2015).
- 1019 35 Zhu, Z. *et al.* Collective effects of SNPs on transgenerational inheritance in  
1020 *Caenorhabditis elegans* and budding yeast. *Genomics* **106**, 23-29,  
1021 doi:10.1016/j.ygeno.2015.04.002 (2015).
- 1022 36 Biswas, K., Chakraborty, S., Podder, S. & Ghosh, T. C. Insights into the dN/dS ratio  
1023 heterogeneity between brain specific genes and widely expressed genes in species  
1024 of different complexity. *Genomics* **108**, 11-17, doi:10.1016/j.ygeno.2016.04.004  
1025 (2016).
- 1026 37 Zhu, Z., Lu, Q., Zeng, F., Wang, J. & Huang, S. Compatibility between mitochondrial  
1027 and nuclear genomes correlates with quantitative trait of lifespan in *Caenorhabditis*  
1028 *elegans*. *Sci. Rep.*, doi:10.1038/srep17303 (2015).
- 1029 38 Huang, S. The overlap feature of the genetic equidistance result, a fundamental  
1030 biological phenomenon overlooked for nearly half of a century. *Biological Theory* **5**,  
1031 40-52 (2010).

- 1032 39 Huang, S. Primate phylogeny: molecular evidence for a pongid clade excluding  
1033 humans and a prosimian clade containing tarsiers. *Sci China Life Sci* **55**, 709-725  
1034 (2012).
- 1035 40 Huang, S. *Histone methylation and the initiation of cancer*, *Cancer Epigenetics*.  
1036 (CRC Press, 2008).
- 1037 41 Huang, S. Inverse relationship between genetic diversity and epigenetic complexity.  
1038 *Preprint available at Nature Precedings* <<http://dx.doi.org/10.1038/npre.2009.1751.2>>  
1039 (2009).
- 1040 42 Kimura, M. Evolutionary rate at the molecular level. *Nature* **217**, 624-626 (1968).
- 1041 43 King, J. L. & Jukes, T. H. Non-Darwinian evolution. *Science* **164**, 788-798 (1969).
- 1042 44 Romiguier, J. *et al.* Comparative population genomics in animals uncovers the  
1043 determinants of genetic diversity. *Nature* **515**, 261-263, doi:10.1038/nature13685  
1044 (2014).
- 1045 45 Margoliash, E. Primary structure and evolution of cytochrome c. *Proc. Natl. Acad. Sci.*  
1046 **50**, 672-679 (1963).
- 1047 46 Hu, T. *et al.* The genetic equidistance result, misreading by the molecular clock and  
1048 neutral theory and reinterpretation nearly half of a century later. *Sci China Life Sci* **56**,  
1049 254-261 (2013).
- 1050 47 Huang, S. The genetic equidistance result of molecular evolution is independent of  
1051 mutation rates. *J. Comp. Sci. Syst. Biol.* **1**, 092-102 (2008).
- 1052 48 Luo, D. & Huang, S. The genetic equidistance phenomenon at the proteomic level.  
1053 *Genomics* **108**, 25-30, doi:10.1016/j.ygeno.2016.03.002 (2016).
- 1054 49 Lei, X., Yuan, J., Zhu, Z. & Huang, S. Collective effects of common SNPs and risk  
1055 prediction in lung cancer. *Heredity*, doi:10.1038/s41437-41018-40063-41434 (2018).
- 1056 50 Gui, Y., Lei, X. & Huang, S. Collective effects of common SNPs and genetic risk  
1057 prediction in type 1 diabetes. *Clinical genetics*, doi:10.1111/cge.13193 (2017).
- 1058 51 He, P., Lei, X., Yuan, D., Zhu, Z. & Huang, S. Accumulation of minor alleles and risk  
1059 prediction in schizophrenia. *Scientific reports* **7**, 11661,  
1060 doi:10.1038/s41598-017-12104-0 (2017).
- 1061 52 Yuan, D. *et al.* Minor alleles of common SNPs quantitatively affect traits/diseases  
1062 and are under both positive and negative selection. *arXiv:1209.2911* (2012).
- 1063 53 Yuan, D. *et al.* Scoring the collective effects of SNPs: association of minor alleles  
1064 with complex traits in model organisms. *Sci China Life Sci* **57**, 876-888,  
1065 doi:10.1007/s11427-014-4704-4 (2014).
- 1066 54 Dunham, I. *et al.* An integrated encyclopedia of DNA elements in the human genome.  
1067 *Nature* **489**, 57-74, doi:10.1038/nature11247 (2012).
- 1068 55 Prieto-Godino, L. L. *et al.* Olfactory receptor pseudo-pseudogenes. *Nature* **539**,  
1069 93-97, doi:10.1038/nature19824 (2016).
- 1070 56 Lewontin, R. The apportionment of human diversity. *Evolutionary Biology* **6**, 391-398  
1071 (1972).
- 1072 57 Auton, A. *et al.* A global reference for human genetic variation. *Nature* **526**, 68-74,  
1073 doi:10.1038/nature15393 (2015).
- 1074 58 Suwa, G., Kono, R. T., Katoh, S., Asfaw, B. & Beyene, Y. A new species of great ape  
1075 from the late Miocene epoch in Ethiopia. *Nature* **448**, 921-924, doi:nature06113 [pii]  
1076 10.1038/nature06113 (2007).
- 1077 59 Poznik, G. D. *et al.* Sequencing Y chromosomes resolves discrepancy in time to  
1078 common ancestor of males versus females. *Science* **341**, 562-565,  
1079 doi:10.1126/science.1237619 (2013).

- 1080 60 Wilson Sayres, M. A., Lohmueller, K. E. & Nielsen, R. Natural selection reduced  
1081 diversity on human y chromosomes. *PLoS Genet* **10**, e1004064,  
1082 doi:10.1371/journal.pgen.1004064 (2014).
- 1083 61 Poznik, G. D. *et al.* Punctuated bursts in human male demography inferred from  
1084 1,244 worldwide Y-chromosome sequences. *Nat Genet* **48**, 593-599,  
1085 doi:10.1038/ng.3559 (2016).
- 1086 62 Mallick, S. *et al.* The Simons Genome Diversity Project: 300 genomes from 142  
1087 diverse populations. *Nature* **538**, 201-206, doi:10.1038/nature18964 (2016).
- 1088 63 Karmin, M. *et al.* A recent bottleneck of Y chromosome diversity coincides with a  
1089 global change in culture. *Genome Res* **25**, 459-466, doi:10.1101/gr.186684.114  
1090 (2015).
- 1091 64 Black, M. L., Wise, C. A., Wang, W. & Bittles, A. H. Combining genetics and  
1092 population history in the study of ethnic diversity in the People's Republic of China.  
1093 *Human biology* **78**, 277-293, doi:10.1353/hub.2006.0041 (2006).
- 1094 65 Fu, Q. *et al.* The genetic history of Ice Age Europe. *Nature* **534**, 200-205,  
1095 doi:10.1038/nature17993 (2016).
- 1096 66 Lazaridis, I. *et al.* Genomic insights into the origin of farming in the ancient Near East.  
1097 *Nature* **536**, 419-424, doi:10.1038/nature19310 (2016).
- 1098 67 de Manuel, M. *et al.* Chimpanzee genomic diversity reveals ancient admixture with  
1099 bonobos. *Science* **354**, 477-481, doi:10.1126/science.aag2602 (2016).
- 1100 68 Amos, W. Testing an alternative explanation for relatively greater base-sharing  
1101 between Neanderthals and non-African humans. *bioRxiv*, doi:  
1102 <https://doi.org/10.1101/133306> (2017).
- 1103 69 Prufer, K. *et al.* The complete genome sequence of a Neanderthal from the Altai  
1104 Mountains. *Nature* **505**, 43-49, doi:10.1038/nature12886 (2014).
- 1105 70 Prufer, K. *et al.* A high-coverage Neandertal genome from Vindija Cave in Croatia.  
1106 *Science* **358**, 655-658, doi:10.1126/science.aao1887 (2017).
- 1107 71 Schuster, S. C. *et al.* Complete Khoisan and Bantu genomes from southern Africa.  
1108 *Nature* **463**, 943-947, doi:10.1038/nature08795 (2010).
- 1109 72 Gallego Llorente, M. *et al.* Ancient Ethiopian genome reveals extensive Eurasian  
1110 admixture throughout the African continent. *Science* **350**, 820-822,  
1111 doi:10.1126/science.aad2879 (2015).
- 1112 73 Pugach, I., Delfin, F., Gunnarsdottir, E., Kayser, M. & Stoneking, M. Genome-wide  
1113 data substantiate Holocene gene flow from India to Australia. *Proc Natl Acad Sci U S*  
1114 *A* **110**, 1803-1808, doi:10.1073/pnas.1211927110 (2013).
- 1115 74 Rasmussen, M. *et al.* An Aboriginal Australian genome reveals separate human  
1116 dispersals into Asia. *Science* **334**, 94-98, doi:10.1126/science.1211177 (2011).
- 1117 75 Lepre, C. J. *et al.* An earlier origin for the Acheulian. *Nature* **477**, 82-85 (2011).
- 1118 76 Asfaw, B. *et al.* Remains of *Homo erectus* from Bouri, middle Awash, Ethiopia.  
1119 *Nature* **416**, 317-320 (2002).
- 1120 77 Bischoff, J. L. *et al.* High-resolution U-series dates from the Sima de los Huesos  
1121 hominids yields 600+/- kys: implications for the evolution of the early Neanderthal  
1122 lineage. *J. Archaeol. Sci.* **34**, 763-770 (2007).
- 1123 78 Lycett, S. J. Understanding ancient hominin dispersals using artefactual data: a  
1124 phylogeographic analysis of Acheulean handaxes. *PLoS ONE* **4**, e7404,  
1125 doi:10.1371/journal.pone.0007404 (2009).
- 1126 79 Shoffner, J. M. *et al.* Mitochondrial DNA variants observed in Alzheimer disease and  
1127 Parkinson disease patients. *Genomics* **17**, 171-184 (1993).
- 1128 80 van der Walt, J. M. *et al.* Mitochondrial polymorphisms significantly reduce the risk of  
1129 Parkinson disease. *Am J Hum Genet* **72**, 804-811 (2003).

- 1130 81 Picard, M., Wallace, D. C. & Burelle, Y. The rise of mitochondria in medicine.  
1131 *Mitochondrion* **30**, 105-116, doi:10.1016/j.mito.2016.07.003 (2016).
- 1132 82 Charchar, F. J. *et al.* Inheritance of coronary artery disease in men: an analysis of  
1133 the role of the Y chromosome. *Lancet* **379**, 915-922,  
1134 doi:10.1016/S0140-6736(11)61453-0 (2012).
- 1135 83 Sloan, D. B., Havird, J. C. & Sharbrough, J. The On-Again, Off-Again Relationship  
1136 between Mitochondrial Genomes and Species Boundaries. *Molecular ecology*,  
1137 doi:10.1111/mec.13959 (2016).
- 1138 84 Osada, N. & Akashi, H. Mitochondrial-nuclear interactions and accelerated  
1139 compensatory evolution: evidence from the primate cytochrome C oxidase complex.  
1140 *Mol Biol Evol* **29**, 337-346, doi:10.1093/molbev/msr211 (2012).
- 1141 85 Gemmell, N. J. & Sin, F. Y. Mitochondrial mutations may drive Y chromosome  
1142 evolution. *Bioessays* **24**, 275-279, doi:10.1002/bies.10062 (2002).
- 1143 86 Rand, D. M., Haney, R. A. & Fry, A. J. Cytonuclear coevolution: the genomics of  
1144 cooperation. *Trends Ecol Evol* **19**, 645-653, doi:10.1016/j.tree.2004.10.003 (2004).
- 1145 87 Bermudez de Castro, J. M. *et al.* A hominid from the lower Pleistocene of Atapuerca,  
1146 Spain: possible ancestor to Neandertals and modern humans. *Science* **276**,  
1147 1392-1395 (1997).
- 1148 88 Yan, S. *et al.* Y chromosomes of 40% Chinese descend from three Neolithic  
1149 super-grandfathers. *PLoS ONE* **9**, e105691, doi:10.1371/journal.pone.0105691  
1150 (2014).
- 1151 89 He, P. *et al.* Neolithic super-grandfather Y haplotypes, their related surnames, and  
1152 autism spectrum disorder. *bioRxiv* <https://doi.org/10.1101/077222> (2017).
- 1153 90 Shaw, J. C. Taurodont Teeth in South African Races. *Journal of anatomy* **62**,  
1154 476-498 471 (1928).
- 1155 91 Liu, W., Mbu, E., Wu, X. & Zhang, Y. Comparisons of cranial features between  
1156 Chinese and African holocene humans and their implications. *Acta Anthropologica*  
1157 *Sinica* **22**, 89-104 (2003).
- 1158 92 Thorne, A. G. & Wolpoff, M. H. The multiregional evolution of humans. *Scientific*  
1159 *American* **266**, 76-79, 82-73 (1992).
- 1160 93 Wu, X. J., Crevecoeur, I., Liu, W., Xing, S. & Trinkaus, E. Temporal labyrinths of  
1161 eastern Eurasian Pleistocene humans. *Proc Natl Acad Sci U S A* **111**, 10509-10513,  
1162 doi:10.1073/pnas.1410735111 (2014).
- 1163 94 Wu, X. Comparative study of early Homo sapiens from China and Europe. *Acta*  
1164 *Anthropologica Sinica* **7**, 287-293 (1988).
- 1165 95 Li, Z. Y. *et al.* Late Pleistocene archaic human crania from Xuchang, China. *Science*  
1166 **355**, 969-972, doi:10.1126/science.aal2482 (2017).
- 1167 96 Curnoe, D. *et al.* Human remains from the Pleistocene-Holocene transition of  
1168 southwest China suggest a complex evolutionary history for East Asians. *PLoS ONE*  
1169 **7**, e31918, doi:10.1371/journal.pone.0031918 (2012).
- 1170 97 Wu, X. & Poirier, F. E. *Human evolution in China: a metric description of the fossils*  
1171 *and a review of the sites.* (Oxford University Press, 1995).
- 1172 98 Wu, X. Evidence of multiregional human evolution from China. *Quaternary Science*  
1173 **26**, 702-709 (2006).
- 1174 99 Gunz, P. & Bulygina, E. The Mousterian child from Teshik-Tash is a Neanderthal: a  
1175 geometric morphometric study of the frontal bone. *Am J Phys Anthropol* **149**,  
1176 365-379, doi:10.1002/ajpa.22133 (2012).
- 1177 100 Martinon-Torres, M. *et al.* Dental evidence on the hominin dispersals during the  
1178 Pleistocene. *Proc Natl Acad Sci U S A* **104**, 13279-13282,  
1179 doi:10.1073/pnas.0706152104 (2007).

- 1180 101 Wolpoff, M. H. *Human Evolution*. page 662-663 (McGraw-Hill, Inc, 1996).  
1181 102 Brauer, G. & Stringer, C. *Models, polarization, and perspectives on modern human*  
1182 *origins.*, (Aldine de Gruyter, 1997).  
1183 103 Boaretto, E. *et al.* Radiocarbon dating of charcoal and bone collagen associated with  
1184 early pottery at Yuchanyan Cave, Hunan Province, China. *Proc Natl Acad Sci U S A*  
1185 **106**, 9595-9600, doi:10.1073/pnas.0900539106 (2009).  
1186 104 Wu, X. *et al.* Early pottery at 20,000 years ago in Xianrendong Cave, China. *Science*  
1187 **336**, 1696-1700, doi:10.1126/science.1218643 (2012).  
1188 105 Zhang, W. & Yuan, J. A preliminary study of ancient excavated rice from Yuchanyan  
1189 site, Dao County, Hunan Province, P.R.China. . *Acta Agronomica Sinica* **24**, 416-420  
1190 (1998).  
1191 106 Wu, R. & Wu, X. *Paleolithic Sites In China*. (Shanghai Scientific and Technological  
1192 Education Publishing House, 1999).  
1193 107 Lek, M. *et al.* Analysis of protein-coding genetic variation in 60,706 humans. *Nature*  
1194 **536**, 285-291, doi:10.1038/nature19057 (2016).  
1195 108 Nisbett, R. E., Peng, K., Choi, I. & Norenzayan, A. Culture and systems of thought:  
1196 holistic versus analytic cognition. *Psychol Rev* **108**, 291-310 (2001).  
1197 109 Nemat-Gorgani, N. *et al.* Different Selected Mechanisms Attenuated the Inhibitory  
1198 Interaction of KIR2DL1 with C2(+) HLA-C in Two Indigenous Human Populations in  
1199 Southern Africa. *J Immunol* **200**, 2640-2655, doi:10.4049/jimmunol.1701780 (2018).  
1200 110 Li, H. *et al.* The Sequence Alignment/Map format and SAMtools. *Bioinformatics* **25**,  
1201 2078-2079, doi:10.1093/bioinformatics/btp352 (2009).  
1202 111 Danecek, P. *et al.* The variant call format and VCFtools. *Bioinformatics* **27**,  
1203 2156-2158, doi:10.1093/bioinformatics/btr330 (2011).  
1204 112 McKenna, A. *et al.* The Genome Analysis Toolkit: a MapReduce framework for  
1205 analyzing next-generation DNA sequencing data. *Genome Res* **20**, 1297-1303,  
1206 doi:10.1101/gr.107524.110 (2010).  
1207 113 Delaneau, O., Zagury, J. F. & Marchini, J. Improved whole-chromosome phasing for  
1208 disease and population genetic studies. *Nat Methods* **10**, 5-6,  
1209 doi:10.1038/nmeth.2307 (2013).  
1210 114 Howie, B. N., Donnelly, P. & Marchini, J. A flexible and accurate genotype imputation  
1211 method for the next generation of genome-wide association studies. *PLoS Genet* **5**,  
1212 e1000529, doi:10.1371/journal.pgen.1000529 (2009).  
1213 115 Zhu, Z., Lu, X., Yuan, D. & Huang, S. Close genetic relationships between a spousal  
1214 pair with autism-affected children and high minor allele content in cases in  
1215 autism-associated SNPs. *Genomics*, 10.1016/j.ygeno.2016.1012.1001,  
1216 doi:10.1016/j.ygeno.2016.12.001 (2016).  
1217 116 Yang, J., Lee, S. H., Goddard, M. E. & Visscher, P. M. GCTA: a tool for  
1218 genome-wide complex trait analysis. *Am J Hum Genet* **88**, 76-82,  
1219 doi:10.1016/j.ajhg.2010.11.011 (2011).  
1220 117 Purcell, S. *et al.* PLINK: A tool set for whole-genome association and  
1221 population-based linkage analyses. *Am J Hum Genet* **81**, 559-575 (2007).  
1222  
1223  
1224  
1225  
1226
